# Supplementary material for: Genetic Organisation, Mobility and Predicted Functions of Genes on Integrated, Mobile Genetic Elements in Sequenced Strains of Clostridium difficile
Source: PubMed Central journal article supplement (PMC3158075; doi:10.1371/journal.pone.0023014), 2011-08-18
Supplement: pone.0023014.s002.pdf [file pone.0023014.s002.pdf]

**Table S2; Bacterial strains and plasmids produced in this study**

| Strain or plasmid                          | Properties                                                        | Reference  |
|--------------------------------------------|-------------------------------------------------------------------|------------|
| <i>Strain</i>                              |                                                                   |            |
| <i>C. difficile</i> 630ΔErm                | Tc <sup>R</sup> Linc <sup>S</sup> Rif <sup>S</sup>                | [1]        |
| <i>C. difficile</i> CD37                   | Tc <sup>S</sup> Linc <sup>S</sup> Rif <sup>R</sup> , Ribotype 009 | [2]        |
| <i>E. coli</i> CA434                       |                                                                   |            |
| <i>C. difficile</i> 630ΔErm-CD0364::ErmRAM | Clostron insertion in CD0364                                      | This study |
| <i>C. difficile</i> 630ΔErm-CD0386::ErmRAM | Clostron insertion in CD0386                                      | This study |
| <i>C. difficile</i> 630ΔErm-CD0428::ErmRAM | Clostron insertion in CD0428                                      | This study |
| <i>C. difficile</i> 630ΔErm-CD1099::ErmRAM | Clostron insertion in CD1099                                      | This study |
| <i>C. difficile</i> 630ΔErm-CD1873::ErmRAM | Clostron insertion in CD1873                                      | This study |
| <i>C. difficile</i> 630ΔErm-CD3392::ErmRAM | Clostron insertion in CD3392                                      | This study |
| <i>Plasmid</i>                             |                                                                   |            |
| pMTL007                                    | Cm <sup>R</sup> , Linc <sup>R</sup>                               | Heap 2007  |
| pMTL007-CD0364                             | pMTL007, RAM retargeted to CD0364                                 | This study |
| pMTL007-CD0386/CD3392                      | pMTL007, RAM retargeted to CD0386/CD3392                          | This study |
| pMTL007C-E5-CD0428                         | pMTL007, RAM retargeted to CD0428                                 | This study |
| pMTL007C-E5 CD1099                         | pMTL007, RAM retargeted to CD1099                                 | This study |
| pMTL007-CD1873                             | pMTL007, RAM retargeted to CD1873                                 | This study |

Tc: tetracycline, Linc: lincomycin, Rif: Rifampicin, Cm: chloramphenicol, <sup>R</sup>: resistant, <sup>S</sup>: sensitive

### References

- Hussain HA, Roberts AP, Mullany P (2005) Generation of an erythromycin-sensitive derivative of *Clostridium difficile* strain 630 (630Deltaerm) and demonstration that the conjugative transposon Tn916DeltaE enters the genome of this strain at multiple sites. J Med Microbiol 54: 137-141.
- Hachler H, Kayser FH, Berger-Bachi B (1987) Homology of a transferable tetracycline resistance determinant of *Clostridium difficile* with *Streptococcus (Enterococcus) faecalis* transposon Tn916. Antimicrob Agents Chemother 31: 1033-1038.
