# Supplementary material for: Genetic Organisation, Mobility and Predicted Functions of Genes on Integrated, Mobile Genetic Elements in Sequenced Strains of Clostridium difficile
Source: PubMed Central journal article supplement (PMC3158075; doi:10.1371/journal.pone.0023014), 2011-08-18
Supplement: pone.0023014.s003.pdf [file pone.0023014.s003.pdf]

**Table S3; PCR primers used to amplify junctions of circular intermediates of conjugative transposons and empty target sites**

| Primer          | Sequence 5'-3'               |
|-----------------|------------------------------|
| CTn1 LEO        | GGGCTTATCAAGCAATCCAA         |
| CTn1 REO        | GAAATCTGGTCGGCACTCAT         |
| CTn1 TSF        | GCAAAAAGTTGCAGGAATCAT        |
| CTn1 TSR        | GAGAAAATGGCTCTGCTATGC        |
| CTn2 LEO        | CGAAATTGATCCTGCAATGA         |
| CTn2 REO        | GTTCCAAGTCCGTTTTTCGCT        |
| CTn2 TSF        | ACCCTCCTAGACCAGGCATT         |
| CTn2 TSR        | CAACATGAGAAACCAGACGGTA       |
| CTn3 LEO        | CCACTTGATATGAAAAATCAAATGGCTC |
| CTn3 REO        | CCGTTCTATGCTGTGTGAGCTG       |
| CTn3 TSF        | GCGAAAACCTGCTTGGATT          |
| CTn3 TSR        | CCTTTGTTTTCTACATCAAGTATAGCC  |
| CTn4 LEO        | TGAACCCCAAAGCATTGCAG         |
| CTn4 REO        | TGGTGGTTGCTCATAACCG          |
| CTn4 TSF        | GGATAATGCAATAGAAGCATGTG      |
| CTn4 TSR        | CATATCACCTTCCTATCCAATTCTT    |
| CTn5 LEO        | CATCCCACCTGATAGGCAAG         |
| CTn5 REO        | GATGCCGTTGCTGAGGTAAT         |
| CTn5 TSF        | GCGCCATTGGAAATGACTAT         |
| CTn5 TSR        | CCAGTCCATGGTTGAAAAGTT        |
| CTn6 LEO        | CCAAAGACGCAAGCCAGTAT         |
| CTn6 REO        | CGGCAGGGAGGATAACTACA         |
| CTn6 TSF        | CGCTCTTGCCCATATTTTCAAG       |
| CTn6 TSR        | CGCATCAGGAACATTGACTA         |
| CTn7 LEO        | GACCCTGCACAGTTGACCTT         |
| CTn7 REO        | CTTGTGAGCTTCGCCATACT         |
| CTn7 TSF        | CCGAAATCGCTTTACAGTGG         |
| CTn7 TSR        | CCCACCTAGAAAGGGATGTG         |
| R20291 CTn1 LEO | GTGAGGGATTGCCAAAGGTA         |
| R20291 CTn1 REO | CGGCACTCATACGGGTACTT         |
| R20291 CTn1 TSF | GATTCGTTAAATGCCTCTTTATTG     |
| R20291 CTn1 TSR | GAGTGAAGAAGACTGGTTGACAGA     |
| R20291 CTn5 LEO | CCAACCATTGGTATTCCGTA         |
| R20291 CTn5 REO | GATGCCGTTGCTGAGGTAAT         |
| R20291 CTn5 TSF | GCGCCATTGGAAATGACTAT         |
| R20291 CTn5 TSR | CCAGTCCATGGTTGAAAAGTT        |
| 23M63 CTn1 LEO  | GAAGCCCGTACACAATCGTT         |
| 23M63 CTn1 REO  | GGGCTTATCAAGCAATCCAA         |
| 23M63 CTn1 TSF  | GGCTTCTTTAATTTGCTCTTTA       |
| 23M63 CTn1 TSR  | GGTTGTGTTTGCAGCTGTTA         |
| 23M63 CTn5 LEO  | CGCCTTTGGTAACCATTGT          |
| 23M63 CTn5 REO  | GCATTGAAGAAAAGGCTTGAG        |

LEO = Left End Out; REO = Right End Out; TSF = Target Site Forward; TSR = Target Site Reverse.
