# Supplementary material for: Genetic Organisation, Mobility and Predicted Functions of Genes on Integrated, Mobile Genetic Elements in Sequenced Strains of Clostridium difficile
Source: PubMed Central journal article supplement (PMC3158075; doi:10.1371/journal.pone.0023014), 2011-08-18
Supplement: pone.0023014.s004.pdf [file pone.0023014.s004.pdf]

**Supplementary table 4; PCR primers used to produce Clostron mutants, and to screen transconjugant cells**

| Primer                    | Sequence 5'-3'                                               |
|---------------------------|--------------------------------------------------------------|
| <i>Intron retargeting</i> |                                                              |
| EBS universal             | CGAAATTAGAACTTGCGTTCAGTAAAC                                  |
| IBS CD0364                | AAAAAAGCTTATAATTATCCTTATGACACAGAAATGTGCGCCCAGATAGGGTG        |
| EBS1d CD0364              | CAGATTGTACAAATGTGGTGATAACAGATAAGTCAGAAATGTTAACTTACCTTTCTTTGT |
| IBS CD0386/CD3392         | AAAAAAGCTTATAATTATCCTTAGTCATCCATTACGTGCGCCCAGATAGGGTG        |
| EBS1d CD0386/CD3392       | CAGATTGTACAAATGTGGTGATAACAGATAAGTCCATTACTTTAACTTACCTTTCTTTGT |
| EBS2 CD0386/CD3392        | TGAACGCAAGTTTCTAATTTGATTATGACTCGATAGAGGAAAGTGTCT             |
| IBS CD1873                | AAAAAAGCTTATAATTATCCTTATAAAACATTTACGTGCGCCCAGATAGGGTG        |
| EBS1d CD1873              | CAGATTGTACAAATGTGGTGATAACAGATAAGTCATTTACCATAACTTACCTTTCTTTGT |
| EBS2 CD1873               | TGAACGCAAGTTTCTAATTTGTTTTATCGATAGAGGAAAGTGTCT                |
| <i>Plasmid sequencing</i> |                                                              |
| pMTL007-R1                | AGGGTATCCCCAGTTAGTGTTAAGTCTTGG                               |
| 5402F-F1                  | TTAAGGAGGTGTATTTTCATATGACCATGATTACG                          |
| <i>Mutant screening</i>   |                                                              |
| CD0364 TSF                | GATTAAAGCCCTCGCACAAAG                                        |
| CD0364 TSR                | CGTAACCAGCGGACACATTA                                         |
| CD0386/CD3392 TSF         | CCCAAAATGAAAGGAGCATT                                         |
| CD0386/CD3392 TSR         | GCGTCCGCTAATTTTGTGAT                                         |
| CD1873 TSF                | CAATAATGAAATCAAGCAATGAAA                                     |
| CD1873 TSR                | GCTTCGAGTGAAACAACATTCT                                       |
| CD0428 TSF                | CATGGAATCTTCGCATCAGA                                         |
| CD0428 TSR                | GCGAATGTCCTCACTAACCG                                         |
| CD1099 TSF                | GTCCATACCGGCATCATAA                                          |
| CD1099 TSR                | CAGAAAGGACGGGTGTTGTT                                         |
| ErmRAM-F                  | ACGCGTTATATTGATAAAAATAATAATAGTGGG                            |
| ErmRAM-R                  | ACGCGTGCGACTCATAGAATTTTCTCCCG                                |

|                                 |                          |
|---------------------------------|--------------------------|
| <i>Transconjugant screening</i> |                          |
| lok1                            | AAAATATACTGCACATCTGTATAC |
| lok3                            | TTTACCAGAAAAAGTAGCTTAA   |
