# Supplementary material for: Genetic Organisation, Mobility and Predicted Functions of Genes on Integrated, Mobile Genetic Elements in Sequenced Strains of Clostridium difficile
Source: PLoS One. 2011 Aug 18;6(8):e23014. doi: 10.1371/journal.pone.0023014 (PMC3158075; doi:10.1371/journal.pone.0023014)
Supplement: Table S1 — Results of BYPASS, PSORT, SMART and PRODOM searches of hypothetical proteins. (XLS) [file pone.0023014.s001.xls]

## Sheet: CTn1-like
strain	ORF	Annotated funtion			E-value	first 50 results, only non C. diff									PSORT	SMART domain	AA start	AA end	E-value	PRODOM
43255	6105	putative glyoxalase		4 | 4	1e-44	Glyoxalase/bleomycin resistance protein/dioxygenase [Bifidobacterium longum subsp. infantis ATCC 15697]									bacterial cytoplasm= 0.148(Affirmative) < succ>	Pfam:Glyoxalase	2	115	1.2e-11	1.4e-11	Glyoxalase/bleomycin resistance protein/dioxygenase
				26 | 62	4e-33	ref|ZP_02615977.1| proton-dependent oligopeptide transporter [Clostridium botulinum Bf]														0.009	Glyoxalase/extradiol ring-cleavage dioxygenase
				27 | 157	2e-31	ref|YP_339609.1| glyoxalase I, nickel isomerase (lactoylglutathione lyase) [Pseudoalteromonas haloplanktis TAC125]
				28 | 231	2e-30	ref|NP_926507.1| lactoylglutathione lyase [Gloeobacter violaceus PCC 7421]
				48 | 230	2e-30	ref|ZP_01788307.1| aspartyl-tRNA synthetase [Haemophilus influenzae 3655]
	6110	hypothetical protein													bacterial cytoplasm= 0.154(Affirmative) < succ>
	6115	hydrolase		2 | 198	5e-40	ref|ZP_04858022.1| hydrolase [Ruminococcus sp. 5_1_39B_FAA]
				18 | 226	2e-39	ref|ZP_00143488.1| Alpha/beta hydrolase [Fusobacterium nucleatum subsp. vincentii ATCC 49256]
	6120	hypothetical protein													bacterial membrane= 0.121(Affirmative) < succ>	low complexity	26	36	-		transmembrane_regions
	6125	signal peptide		11 | 98	1e-12	gb|ACX94483.1| YcxB [Bacillus subtilis]				non-ribosomal synthesis of lipopeptides and polyketides					bacterial membrane= 0.576(Affirmative) < succ>	transmembrane	34	51	-		signal-peptide
																transmembrane	55	77	-		transmembrane_regions
	6210	Permease of the MFS		1 | 106	6e-88	ref|ZP_05422080.1| multidrug resistance protein [Enterococcus faecalis T1]									bacterial membrane= 0.486(Affirmative) < succ>	Pfam:Sugar_tr	3	385	8.2e-07	3.4e-28	Tetracycline resistance protein, TetA
				2 | 107	1e-87	ref|ZP_03980641.1| MFS family major facilitator transporter, multidrug:cation symporter [Enterococcus faecium TX1330]										Pfam:LacY_symp	5	386	0.0021	2.9e-59	Major facilitator superfamily MFS-1
				52 | 164	7e-86	gb|AAW66497.1| TetA(39) [Acinetobacter sp. LUH5605]										Pfam:MFS_1	9	347	8.8e-68	9.8e-76	MAJOR FACILITATOR SUPERFAMILY MEMBER
																Pfam:PUCC	40	379	0.0074	9.8e-76	TETRACYCLINE-EFFLUX TRANSPORTER
	6215	teicoplanin resistance		6 | 24	2e-18	ref|ZP_03099564.1| protein VanZ [Bacillus cereus W]
	6220	hypothetical protein													bacterial cytoplasm= 0.259(Affirmative) < succ>
	6225	conjugative transposon protein		8 | 1	1e-60	ref|ZP_05922531.1| conjugative transposon protein [Enterococcus faecium TC 6]
				50 | 49	5e-54	gb|AAO24817.1|AF333235_11 Orf13 [Clostridium difficile]
	6230	lysophospholipase		1 | 168	3e-71	ref|NP_173272.2| hydrolase, alpha/beta fold family protein [Arabidopsis thaliana]
				12 | 142	3e-72	ref|ZP_04382523.1| monoglyceride lipase [Rhodococcus erythropolis SK121]
	6235	TetR transcriptional regulator		2 | 7	3e-37	ref|ZP_03697306.1| transcriptional regulator, TetR family [Lutiella nitroferrum 2002]
				4 | 90	2e-34	ref|YP_001726102.1| DNA-binding transcriptional repressor AcrR [Escherichia coli ATCC 8739]
	6240	ABC transporter		1 | 44	1e-106	ref|YP_502979.1| daunorubicin resistance ABC transporter ATP-binding subunit [Methanospirillum hungatei JF-1]
				7 | 9	1e-111	ref|YP_002307378.1| ABC-type multidrug transporter, ATPase component [Thermococcus onnurineus NA1]
	6245	ABC transporter		1 | 8	3e-52	ref|ZP_05971440.1| ABC-type multidrug transport system [Providencia rustigianii DSM 4541]
	6250	ABC transporter		1 | 23	4e-49	ref|YP_002150956.1| ABC-type multidrug transport system [Proteus mirabilis HI4320]
	6255	cation efflux family protein		5 | 30	2e-88	ref|ZP_05634710.1| cation efflux family protein [Fusobacterium ulcerans ATCC 49185]									bacterial membrane= 0.338(Affirmative) < succ>	Pfam:Cation_efflux	19	298	3.7e-90	1.4e-58	CATION EFFLUX PROTEIN/ ZINC TRANSPORTER
				10 | 258	9e-82	| cobalt-zinc-cadmium resistance protein czcD [Clostridium tetani E88]
	6260	hypothetical protein													bacterial membrane= 0.788(Affirmative) < succ>	transmembrane	4	23	-		transmembrane_regions
	6265	TetR family transcriptional regulator		3 | 56	3e-41	ref|YP_002149917.1| acrAB operon repressor (tetR-family transcriptional regulator) [Proteus mirabilis HI4320]
				6 | 78	9e-41	ref|YP_002278271.1| transcriptional regulator, TetR family [Rhizobium leguminosarum bv. trifolii WSM2304]
	6270	hypothetical protein		1 | 204	4e-53	ref|ZP_05496661.1| Methyltransferase type 11 [Clostridium papyrosolvens DSM 2782]									bacterial cytoplasm= 0.402(Affirmative) < succ>	Pfam:Methyltransf_11	43	142	2.8e-05	1.1e-08	Methyltransf_11
				23 | 102	8e-09	dbj|BAD80838.1| phosphoethanolamine N-methyltransferase [Atriplex nummularia]														4.2e-08	METHYLTRANSFERASE
	6275	teicoplanin resistance protein		11 | 128	3e-16	ref|YP_003242587.1| VanZ family protein [Geobacillus sp. Y412MC10]									bacterial membrane= 0.637(Affirmative) < succ>	Pfam:VanZ	10	137	9e-30	2.4e-27	VanZ like protein
				14 | 248	7e-14	ref|NP_782003.1| putative permease [Clostridium tetani E88										transmembrane	141	163	-		transmembrane_regions
				24 | 32	9e-19	ref|YP_893743.1| teicoplanin resistance protein [Bacillus thuringiensis str. Al Hakam]
	6280	hypothetical protein													bacterial cytoplasm= 0.173(Affirmative) < succ>
	6285	hypothetical protein													bacterial cytoplasm= 0.234(Affirmative) < succ>	low complexity	62	76	-
	6290	hypothetical protein													bacterial cytoplasm= 0.233(Affirmative) < succ>	transmembrane	20	38	-
	6295	hypothetical protein		2 | 70	2e-42	ref|YP_001759624.1| ECF subfamily RNA polymerase sigma-24 factor [Shewanella woodyi ATCC 51908									bacterial cytoplasm= 0.322(Affirmative) < succ>	Pfam:Sigma70_r4_2	78	131	1.6e-09	6.7e-11	Sigma70_r4_2
				6 | 121	1e-41	ref|YP_002906762.1| ECF-family sigma factor H [Corynebacterium kroppenstedtii DSM 44385]										Pfam:Sigma70_r4	84	133	0.00036
	6300	hypothetical protein		14 | 30	9e-22	ref|YP_001089889.1| putative conjugative transposon excisionase [Clostridium difficile 630]									bacterial cytoplasm= 0.151(Affirmative) < succ>
R20291	3453	collagen-binding surface protein		21 | 20	1e-147	ref|ZP_04743738.1| putative LPXTG-motif protein cell wall anchor domain protein [Roseburia intestinalis L1-82]									bacterial membrane= 0.281(Affirmative) < succ>	signal peptide	1	36	-	3e-08	COLLAGEN ADHESION WALL CELL PEPTIDOGLYCAN-ANCHOR PLASMID
				72 | 75	2e-83	ref|ZP_05348155.1| Cna protein B-type domain protein [Bryantella formatexigens DSM 14469]										Pfam:Cna_B	237	308	0.032	0.0003	COLLAGEN PLASMID ADHESION
																Pfam:Cna_B	491	575	0.013
																low complexity	835	867	-
																transmembrane	871	893	-
	3455	hypothetical protein		4 | 5	5e-45	ref|YP_002321793.1| Glyoxalase/bleomycin resistance protein/dioxygenase [Bifidobacterium longum subsp. infantis ATCC 15697]									bacterial cytoplasm= 0.148(Affirmative) < succ>	Pfam:Glyoxalase	2	115	1.1e-11	1e-08	LYASE GLYOXALASE GLYOXALASE/BLEOMYCIN RESISTANCE DIOXYGENASE LACTOYLGLUTATION PROTEIN/DIOXYGENASE
				13 | 28	1e-36	ref|YP_001086626.1| putative glyoxalase [Clostridium difficile 630]						CD159								5e-06	GLYOXALASE/BLEOMYCIN RESISTANCE DIOXYGENASE PROTEIN/DIOXYGENASE LYASE FAMILY GLYOXALASE DOMAIN LACTOYLGLUTATHIONE SUPERFAMILY
				26 | 16	9e-38	ref|NP_347186.1| lactoylglutation lyase [Clostridium acetobutylicum ATCC 824]														2e-05	LYASE GLYOXALASE GLYOXALASE/BLEOMYCIN ATU1872 AGR_C_3434P RESISTANCE DIOXYGENASE LACTOYLGLUTATION PROTEIN/DIOXYGENASE
				36 | 43	1e-33	ref|ZP_02615977.1| proton-dependent oligopeptide transporter [Clostridium botulinum Bf]
	3456	hypothetical protein													bacterial membrane= 0.121(Affirmative) < succ	low complexity	26	36	-
	3457	hypothetical protein		11 | 86	1e-13	gb|ACX94483.1| YcxB [Bacillus subtilis]									bacterial membrane= 0.576(Affirmative	transmembrane	41	58	-
																transmembrane	62	84	-
	3461	chloramphenicol O-acetyltransferase		1 | 96	5e-70	ref|ZP_04317481.1| Chloramphenicol acetyltransferase [Bacillus cereus ATCC 10876]									bacterial membrane= 0.552(Affirmative
				41 | 207	9e-69	ref|ZP_02477909.1| dihydrolipoamide acetyltransferase [Haemophilus parasuis 29755]
	3462	conjugative transposon protein		3 | 45	6e-35	ref|ZP_05922537.1| conjugative transposon protein [Enterococcus faecium TC 6]									bacterial cytoplasm= 0.412(Affirmative	Pfam:ArdA	17	164	9.6e-07	2e-38	TRANSFERASE CHLORAMPHENICOL ACYLTRANSFERASE ACETYLTRANSFERASE ANTIBIOTIC RESISTANCE PLASMID CAT O-ACETYLTRANSFERASE DIRECT
				7 | 3	3e-42	ref|YP_001086975.1| conjugative transposon protein [Clostridium difficile 630]
				26 | 10	6e-41	ref|ZP_04434255.1| antirestriction protein ArdA [Enterococcus faecalis TX1322]
				47 | 24	3e-39	ref|ZP_00785316.1| TN916 ORF18-like protein lmo1108 [Streptococcus agalactiae COH1]
	3468	hypothetical protein		3 | 161	1e-70	ref|NP_173272.2| hydrolase, alpha/beta fold family protein [Arabidopsis thaliana]									bacterial cytoplasm= 0.032(Affirmative) < succ>					5e-22	HYDROLASE ALPHA/BETA FOLD TRANSFERASE HYDROLASE FAMILY CARRIER PRECURSOR 2.4.1.- SIGNAL
				8 | 8	4e-76	ref|NP_831561.1| lysophospholipase L2 [Bacillus cereus ATCC 14579]														2e-10	HYDROLASE ALPHA/BETA FOLD
	3469	TetR family transcriptional regulator		1 | 95	5e-35	ref|YP_001175679.1| DNA-binding transcriptional repressor AcrR [Enterobacter sp. 638]									bacterial membrane= 0.266(Affirmative) < succ>	Pfam:TetR_N	18	64	1e-10	5e-12	TRANSCRIPTION DNA-BINDING TRANSCRIPTIONAL REGULATION TETR FAMILY REGULATORY REGULATOR REGULATOR PROTEIN
				2 | 219	3e-32	ref|YP_002949786.1| transcriptional regulator, TetR family [Geobacillus sp. WCH70]														7e-08	TRANSCRIPTION DNA-BINDING PROTEIN REGULATORY REGULATION TETR
				5 | 94	5e-35	ref|ZP_04560663.1| transcriptional repressor for envCD [Citrobacter sp. 30_2]
	3470	ABC transporter ATPbinding		1 | 191	1e-104	gb|EET90542.1| daunorubicin resistance ABC transporter ATPase subunit [Candidatus Micrarchaeum acidiphilum ARMAN-2]									bacterial cytoplasm= 0.208(Affirmative) < succ>	AAA	51	229	4.5e-10	5e-12	ATP-BINDING MEMBRANE NUCLEOTIDE-BINDING ABC TRANSPORTER INNER TRANSPORTER ATPASE HYDROLASE COMPONENT
				7 | 226	1e-103	ref|NP_619072.1| antibiotic resistance ABC transporter ATP-binding protein [Methanosarcina acetivorans C2A]														6e-12	ATP-BINDING MEMBRANE NUCLEOTIDE-BINDING ABC TRANSPORTER INNER TRANSPORTER ATPASE HYDROLASE COMPONENT
				24 | 30	1e-110	ref|ZP_05809533.1| nodulation ABC transporter NodI [Mesorhizobium opportunistum WSM2075]														2e-10	NUCLEOTIDE-BINDING REPEAT ATP-BINDING CG1494-PA
	3471	ABC transporter permease		1 | 26	8e-47	ref|YP_002140065.1| ABC-2 type transporter [Geobacter bemidjiensis Bem]									bacterial membrane= 0.576(Affirmative) < succ>	signal peptide	1	35	-	6e-18	PRECURSOR SIGNAL
				4 | 58	2e-45	ref|ZP_04637687.1| Inner membrane transport permease ybhS [Yersinia intermedia ATCC 29909]										transmembrane	45	67	-
				10 | 36	3e-46	gb|AAL27382.1|AF426171_13 ElsD [Yersinia pestis]										transmembrane	88	110	-
				13 | 56	1e-45	ref|YP_069745.1| multidrug ABC transporter permease [Yersinia pseudotuberculosis IP 32953]										transmembrane	115	137	-
																transmembrane	144	166	-
																transmembrane	191	210	-
	3472	ABC transporter permease		3 | 106	3e-43	ref|YP_002150956.1| ABC-type multidrug transport system [Proteus mirabilis HI4320]									bacterial membrane = 0.556(Affirmative) < succ>	transmembrane	19	41	-	2e-10	PRECURSOR SIGNAL
																transmembrane	56	78	-	1e-06	ANTIBIOTIC-TRANSPORT ALANINE MEMBRANE PROBABLE ABC VALINE LEUCINE INTEGRAL RICH TRANSPORTER
																transmembrane	99	121	-	2e-05	RICH ALANINE MEMBRANE PROBABLE ABC LEUCINE VALINE TRANSPORTER ANTIBIOTIC-TRANSPORT INTEGRAL
																transmembrane	131	153	-
																transmembrane	166	188	-
																transmembrane	203	222	-
	3473	hypothetical protein		5 | 42	9e-89	ref|ZP_05634710.1| cation efflux family protein [Fusobacterium ulcerans ATCC 49185]									bacterial membrane= 0.338(Affirmative) < succ>	transmembrane	21	40	-	2e-18	CATION EFFLUX FAMILY SYSTEM PRECURSOR SIGNAL TRANSMEMBRANE MEMBRANE RESISTANCE COBALT-ZINC-CADMIUM
				11 | 207	2e-83	ref|YP_001324053.1| cation diffusion facilitator family transporter [Methanococcus vannielii SB]										transmembrane	86	108	-	1e-16	CATION EFFLUX FAMILY ZINC TRANSPORTER SYSTEM MEMBRANE TRANSMEMBRANE RESISTANCE COBALT-ZINC-CADMIUM
				30 | 211	3e-83	ref|NP_633802.1| cobalt-zinc-cadmium resistance protein [Methanosarcina mazei Go1										transmembrane	121	143	-	6e-10	CATION PREDICTED CO/ZN/CD TRANSPORTERS TRANSPORTER
																transmembrane	182	204	-	1e-08	CATION EFFLUX FAMILY SYSTEM RESISTANCE COBALT-ZINC-CADMIUM PRECURSOR SIGNAL CZCD TRANSMEMBRANE
	3474	hypothetical protein		12 | 8	1e-41	ref|ZP_04744203.2| sigma-70, region 4 superfamily [Roseburia intestinalis L1-82]									bacterial cytoplasm= 0.260(Affirmative) < succ>					4e-06	TRANSCRIPTION DNA-BINDING REGULATION LIN1619 EF0004 LMO1099 PLASMID
				17 | 46	8e-29	ref|ZP_04563999.1| conjugative transposon protein [Mollicutes bacterium D7]														6e-05	TRANSCRIPTION ORF7 DNA-BINDING REGULATION 1-24 TN916 SAG0919 PLASMID TRANSPOSON TETM
				24 | 84	2e-25	ref|ZP_04436356.1| DNA-directed RNA polymerase sigma subunit RpoE [Enterococcus faecalis TX1322]
23M63	2977	hypothetical protein													bacterial membrane = 0.527(Affirmative) < succ>	transmembrane	5	27	-		PROKAR_LIPOPROTEIN
																transmembrane	53	74	-		signal-peptide
																					transmembrane_regions
	2982	hypothetical protein													bacterial cytoplasm = 0.180(Affirmative)
	2987	conjugative transposon FtsK/SpoIIIE-related		1 | 226	1e-146	ref|YP_983430.1| cell divisionFtsK/SpoIIIE [Polaromonas naphthalenivorans CJ2]
				2 | 100	1e-149	emb|CBA08065.1| putative cell division protein [Neisseria meningitidis alpha153]
				14 | 46	1e-150	emb|CAX50172.1| DNA translocase FtsK2 [Neisseria meningitidis 8013]
	2992	hypothetical protein													bacterial cytoplasm= 0.265(Affirmative) < succ>
	2997	conjugative transposon replication initiation factor		11 | 19	1e-100	ref|YP_001089907.1| putative conjugative transposon replication initiation factor [Clostridium difficile 630]
				20 | 52	2e-92	ref|ZP_05345201.1| transcriptional regulator, Cro/CI family [Bryantella formatexigens DSM 14469]
	3002	conjugative transposon protein		9 | 9	3e-09	ref|YP_001086846.1| conjugative transposon protein [Clostridium difficile 630]
	3007	conjugative transposon protein		3 | 3	2e-21	ref|YP_001089906.1| conjugative transposon protein [Clostridium difficile 630]
				7 | 29	4e-18	gb|ABC48882.1| hypothetical protein [Enterococcus faecium]
	3012	hypothetical protein													bacterial membrane= 0.486(Affirmative) < succ>	Pfam:DUF1648	14	55	0.00011	7.6e-08	DUF1648
																transmembrane	86	108	-
	3017	putative acetyltransferase		13 | 124	4e-33	ref|ZP_05390466.1| GCN5-related N-acetyltransferase [Clostridium carboxidivorans P7]
				19 | 247	2e-31	ref|ZP_04567642.1| alpha/beta hydrolase [Fusobacterium mortiferum ATCC 9817]
				24 | 177	2e-32	ref|YP_001420254.1| YdiD [Bacillus amyloliquefaciens FZB42]
	3022	hypothetical protein													bacterial cytoplasm= 0.414(Affirmative) < succ>
	3082	hypothetical protein		9 | 10	4e-61	ref|ZP_05375370.1| Choloylglycine hydrolase [Hyphomicrobium denitrificans ATCC 51888]									bacterial cytoplasm= 0.255(Affirmative) < succ>
				12 | 99	8e-52	ref|ZP_04779871.1| hydrolase [Sphingobacterium spiritivorum ATCC 33861]
				15 | 169	1e-48	ref|ZP_05647529.1| bile salt hydrolase [Enterococcus casseliflavus EC30]
	3087	hypothetical protein													bacterial cytoplasm= 0.168(Affirmative) < succ>	low complexity	10	21	-
																low complexity	64	74	-
	3092	Two component histidine kinase		2 | 374	1e-103	ref|ZP_00238807.1| sensory box histidine kinase PhoR, putative [Bacillus cereus G9241]
				4 | 61	1e-109	ref|YP_001127496.1| sensory box histidine kinase YycG [Geobacillus thermodenitrificans NG80-2]
	3097	two component transcriptional regulator		1 | 30	2e-97	ref|YP_002940275.1| two component transcriptional regulator, winged helix family [Kosmotoga olearia TBF 19.5.1]
				3 | 231	2e-92	ref|ZP_05901139.1| DNA-binding response regulator TrcR [Leptotrichia hofstadii F0254]
				5 | 190	3e-93	ref|NP_742217.1| DNA-binding heavy metal response regulator, putative [Pseudomonas putida KT2440]
	3102	hypothetical protein													bacterial cytoplasm= 0.513(Affirmative) < succ>
	3107	ABC transporter ATP-binding protein		1 | 196	1e-116	ref|YP_001300071.1| ABC transporter permease protein [Bacteroides vulgatus ATCC 8482
				2 | 30	1e-124	ref|ZP_05318453.1| macrolide export ATP-binding/permease protein MacB [Neisseria sicca ATCC 29256]
	3112	hypothetical protein		2 | 230	2e-93	ref|ZP_04575661.1| macrolide export ATP-binding/permease macB [Fusobacterium sp. 7_1]									bacterial membrane= 0.686(Affirmative) < succ>	transmembrane	19	38	-	1.4e-15	FtsX	PF02687
				3 | 73	1e-100	ref|ZP_03854578.1| ABC-type antimicrobial peptide transport system, permease component [Veillonella parvula DSM 2008]										Pfam:FtsX	326	473	2.2e-15		signal-peptide
																often predicted permeases					transmembrane_regions
	3117	hypothetical protein		2 | 148	3e-92	ref|YP_829116.1| ABC transporter related [Solibacter usitatus Ellin6076]									bacterial cytoplasm= 0.437(Affirmative) < succ>	AAA	29	205	7.89e-15	1.8e-53	ABC_tran
				4 | 149	3e-92	ref|YP_001740206.1| ABC transporter, ATP-binding protein [Candidatus Cloacamonas acidaminovorans]														3.6e-14	AAA
				14 | 17	1e-96	ref|YP_002754458.1| efflux ABC transporter, macrolide exporter (MacB) family, ATP-binding protein [Acidobacterium capsulatum ATCC 51196]														NA	ABC_TRANSPORTER_1
	3122	hypothetical protein		1 | 20	1e-33	ref|ZP_05345211.3| RNA polymerase sigma-E factor [Bryantella formatexigens DSM 14469]									bacterial cytoplasm= 0.291(Affirmative) < succ>	Pfam:Sigma70_r4	85	134	0.0058
				4 | 108	1e-31	gb|ABE97152.1| Sigma-70 [Pasteuria ramosa]
				9 | 176	6e-31	ref|YP_175847.1| sporulation sigma factor SigE [Bacillus clausii KSM-K16]
				18 | 241	2e-29	ref|YP_518636.1| sporulation sigma factor SigK [Desulfitobacterium hafniense Y51]
				39 | 237	2e-29	ref|YP_699053.1| sporulation sigma factor SigK [Clostridium perfringens SM101]
	3127	hypothetical protein		4 | 36	8e-21	ref|NP_687932.1| Tn916 hypothetical protein [Streptococcus agalactiae 2603V/R]									bacterial cytoplasm= 0.144(Affirmative) < succ>
				5 | 54	2e-19	gb|AAO24824.1|AF333235_18 Orf8 [Clostridium difficile]
				26 | 10	8e-23	ref|YP_002350298.1| conjugative transposon protein [Listeria monocytogenes HCC23]
				30 | 45	1e-19	gb|ABB18308.1| Orf8 [Enterococcus faecium]
63Q42	7282	hypothetical protein				BLASTP	gb|ABB18308.1| Orf8 [Enterococcus faecium]				7e-07				bacterial cytoplasm= 0.047(Affirmative) < succ>
	7287	hypothetical protein		1 | 78	1e-34	dbj|BAD38849.1| RNA polymerse sigmaE factor [Shewanella violacea]									bacterial cytoplasm= 0.351(Affirmative) < succ>	Pfam:Sigma70_r4_2	78	131	4.2e-05	5.1e-08	Sigma70_r4_2
				2 | 116	5e-34	ref|ZP_02159620.1| RNA polymerase sigma-70 factor [Shewanella benthica KT99]										Pfam:Sigma70_r4	84	133	0.0052
	7292	hypothetical protein													bacterial cytoplasm= 0.226(Affirmative) < succ>	low complexity	10	21	-
	7297	hypothetical protein		2 | 49	0	ref|YP_001514204.1| ABC transporter related [Alkaliphilus oremlandii OhILAs]									bacterial membrane= 0.497(Affirmative) < succ>	Pfam:ABC_membrane	18	294	2.7e-13	5e-23	ABC_membrane
				3 | 77	0	ref|ZP_02948268.1| ABC-type multidrug/protein/lipid transport system, ATPase component [Clostridium butyricum 5521]										low complexity	301	311	-	5e-13	Q894X5_CLOTE_Q894X5;
																AAA	359	545	1.29e-19	5.9e-19	AAA
																				1.8e-173	HLYB/MSBA FAMILY ABC TRANSPORTER
	7302	recombinase-related protein		1 | 169	4e-34	ref|ZP_02189383.1| resolvase [alpha proteobacterium BAL199]									bacterial cytoplasm= 0.219(Affirmative) < succ>	Resolvase	3	112	1.12e-08	3.2e-15	Resolvase
				11 | 177	5e-34	ref|YP_596265.1| site-specific recombinase [Streptococcus pyogenes MGAS9429]
				25 | 52	2e-36	ref|YP_002296299.1| phage site-specific recombinase, resolvase, putative [Rhodospirillum centenum SW]
	7307	site-specific recombinase		3 | 36	2e-36	ref|ZP_05347855.1| TnpX site-specific recombinase [Bryantella formatexigens DSM 14469]									bacterial cytoplasm=0.146(Affirmative) < succ	Resolvase	13	162	3.9e-31	5.7e-20	Resolvase
																Pfam:Recombinase	184	308	1.4e-22	2.4e-19	Recombinase
																coiled coil	461	483	-
	7312	hypothetical protein													bacterial cytoplasm= 0.218(Affirmative) < succ>
	7317	hypothetical protein													bacterial cytoplasm= 0.029(Affirmative) < succ>
	7322	hypothetical protein		1 | 15	3e-33	ref|ZP_01161535.1| RNA polymerase sigma-70 factor [Photobacterium sp. SKA34]									bacterial cytoplasm= 0.335(Affirmative) < succ>	Pfam:Sigma70_r4_2	79	132	7.2e-05	1.6e-07	Sigma70_r4_2
				3 | 41	2e-32	dbj|BAD38849.1| RNA polymerse sigmaE factor [Shewanella violacea]										Pfam:Sigma70_r4	85	134	0.0059
	7327	florfenicol/chloramphenicol resistance protein		2 | 57	1e-158	ref|ZP_05371661.1| radical SAM enzyme, Cfr family [Geobacillus sp. Y4.1MC1]									bacterial cytoplasm= 0.291(Affirmative) < succ>	Elp3	97	309	0.0215	1.5e-73	TIGR00048: radical SAM enzyme, Cfr family
				5 | 61	1e-158	ref|ZP_04631968.1| Ribosomal RNA large subunit methyltransferase N [Yersinia frederiksenii ATCC 33641]										MoaA, NifB, PqqE, coproporphyrinogen III oxidase,				5.4e-12	Radical_SAM
				9 | 161	1e-155	ref|YP_002125676.1| putative FeS redox enzyme [Alteromonas macleodii 'Deep ecotype']										biotin synthase and MiaB families methyltransferases
	7332	hypothetical protein													bacterial cytoplasm= 0.268(Affirmative)
	7337	hypothetical protein		2 | 28	1e-11	ref|ZP_04804344.1| transcriptional regulator, MarR family [Clostridium cellulovorans 743B]									bacterial cytoplasm = 0.392(Affirmative) < succ>	transmembrane	21	43	-		transmembrane_regions
	7342	hypothetical protein		6 | 61	1e-20	ref|YP_001086985.1| putative conjugative transposon regulatory protein [Clostridium difficile 630]									bacterial cytoplasm = 0.538(Affirmative) < succ>	HTH_XRE	16	71	3.57e-06	1.5e-08	HTH_3
				8 | 116	7e-20	gb|AAO24822.1|AF333235_16 Orf9 [Clostridium difficile]										bacterial plasmid copy control protein, bacterial methylases				2.6e-06	HTH_XRE
				9 | 72	2e-20	gb|AAC36976.1| ORF9 [Enterococcus faecalis]
	7347	hypothetical protein		4 | 44	3e-42	ref|ZP_05615199.1| relaxase/Mobilization nuclease domain protein [Faecalibacterium prausnitzii A2-165]									bacterial cytoplasm= 0.102(Affirmative) < succ>	low complexity	14	20	-
																coiled coil	159	189	-
	7352	hypothetical protein													bacterial cytoplasm= 0.108(Affirmative) < succ>
	7357	hypothetical protein													bacterial membrane= 0.238(Affirmative) < succ>	low complexity	75	86	-
																low complexity	170	181	-
	7362	hypothetical protein													bacterial membrane= 0.363(Affirmative) < succ>	transmembrane	25	44	-		signal-peptide
																transmembrane	59	81	-		transmembrane_regions
	7367	hypothetical protein		44 | 117	2e-14	emb|CAJ43598.1| putative mobilisation protein [Roseburia sp. A2-183]									bacterial cytoplasm= 0.150(Affirmative) < succ>
				46 | 159	5e-13	ref|NP_040368.1| mobilization protein 2 [Plasmid ColE1]
	7372	hypothetical protein													bacterial cytoplasm= 0.239(Affirmative) < succ>
	7377	hypothetical protein													bacterial membrane= 0.232(Affirmative) < succ>
	7382	hypothetical protein		3 | 3	6e-63	ref|ZP_05854203.1| putative bacteriocin [Blautia hansenii DSM 20583]									bacterial membrane= 0.297(Affirmative) < succ>	transmembrane	7	29	-		signal-peptide
				54 | 52	4e-42	ref|ZP_03947534.1| bacteriocin family protein [Enterococcus faecalis TX0104]										low complexity	118	131	-		transmembrane_regions
				108 | 97	1e-13	ref|ZP_03930587.1| bacteriocin [Anaerococcus tetradius ATCC 35098]										low complexity	166	181	-
																transmembrane	184	206	-
																low complexity	219	240	-
	7387	hypothetical protein													bacterial cytoplasm= 0.414(Affirmative) < succ>	coiled coil	2	42	-
	7392	integrase/recombinase		1 | 1	1e-128	ref|ZP_05372281.1| tyrosine recombinase XerD [Geobacillus sp. Y4.1MC1]									bacterial cytoplasm= 0.084(Affirmative) < succ>	Pfam:Phage_integr_N	11	101	1e-07	5.1e-32	Phage_integrase
				24 | 192	1e-117	ref|ZP_05667384.1| phage integrase [Enterococcus faecium 1,141,733]										Pfam:Phage_integrase	135	310	6.9e-28	8.8e-13	Phage_integr_N
	7397	integrase/recombinase		1 | 54	1e-111	ref|ZP_05973240.1| tyrosine recombinase xerd [Providencia rustigianii DSM 4541]									bacterial cytoplasm= 0.315(Affirmative) < succ>	Pfam:Phage_integrase	113	298	1.7e-07	6.6e-20	Phage_integrase
				6 | 150	1e-108	ref|YP_001211760.1| site-specific recombinase XerD [Pelotomaculum thermopropionicum SI]														2.7e-24	Integrase-like, catalytic core, phage
	7402	integrase/recombinase		2 | 11	1e-123	ref|YP_002151735.1| tyrosine recombinase [Proteus mirabilis HI4320]									bacterial cytoplasm= 0.237(Affirmative) < succ>	Pfam:Phage_integrase	223	388	4.9e-21	6.4e-27	Phage_integrase
				3 | 105	1e-119	ref|ZP_04413809.1| tyrosine recombinase XerD [Vibrio cholerae bv. albensis VL426]														3.6e-34	Integrase-like, catalytic core, phage
	7407	hypothetical protein													bacterial cytoplasm= 0.235(Affirmative) < succ>	low complexity	29	38	-
	7412	group II intron reverse transcriptase maturase													bacterial cytoplasm = 0.201(Affirmative) < succ>	Pfam:RVT_1	103	361	7.2e-56	1.6e-47	RNA-directed DNA polymerase (reverse transcriptase)
																HNHc	545	597	2.43e-07	2.2e-08	HNH endonuclease
																reverse trancriptase	nucleases			1.2e-15	RNA-directed DNA polymerase (reverse transcriptase), related
	7417	hypothetical protein		15 | 65	4e-95	ref|ZP_05345720.3| peptidase, M23/M37 family [Bryantella formatexigens DSM 14469]									bacterial membrane= 0.597(Affirmative) < succ>	transmembrane	207	229	-		transmembrane_regions
	7422	hypothetical protein		5 | 57	0	ref|ZP_05615210.1| putative TraE protein [Faecalibacterium prausnitzii A2-165]									bacterial cytoplasm= 0.455(Affirmative) < succ>	low complexity	258	269	-		DUF87
				36 | 247	1e-175	ref|YP_003023957.1| TrbE protein [Photobacterium damselae subsp. piscicida]										Pfam:DUF87	438	646	0.011
				40 | 224	1e-180	ref|YP_001314081.1| type IV secretion/conjugal transfer ATPase [Sinorhizobium medicae WSM419]
				45 | 208	0	ref|YP_001961066.1| rcorf91 [Agrobacterium rhizogenes]
				46 | 217	0	ref|YP_471764.1| conjugal transfer protein E [Rhizobium etli CFN 42
	7427	hypothetical protein													bacterial cytoplasm= 0.014(Affirmative) < succ>	transmembrane	15	37	-
	7432	hypothetical protein		14 | 18	8e-22	ref|YP_001087602.1| putative conjugative transfer protein CD1113 [Clostridium difficile 630]									bacterial membrane= 0.261(Affirmative) < succ>	transmembrane	20	42	-		signal-peptide
				17 | 17	8e-22	emb|CAJ43241.1| MAFF2 protein [Butyrivibrio fibrisolvens]										transmembrane	62	81	-		transmembrane_regions
				34 | 72	1e-12	gb|ACA23199.1| MAFF protein [Bifidobacterium longum]
	7437	hypothetical protein		2 | 2	0	ref|ZP_05854159.1| TraG family protein [Blautia hansenii DSM 20583]									bacterial membrane= 0.272(Affirmative) < succ	Pfam:TraG	113	579	2.7e-14	4.5e-50	TraG
				17 | 26	1e-174	ref|YP_001393692.1| plasmid transfer factor-related protein [Clostridium kluyveri DSM 555]										low complexity	607	622	-
				40 | 53	1e-163	gb|AAF72343.1|AF192329_4 TrsK-like protein [Enterococcus faecalis]										DNA transfer in bacterial conjugation
				42 | 60	1e-161	gb|ACH85927.1| type IV secretory pathway protein VirD4 [Streptococcus pneumoniae]
	7442	hypothetical protein		5 | 5	2e-72	ref|ZP_05854157.1| antirestriction protein [Blautia hansenii DSM 20583]									bacterial cytoplasm= 0.361(Affirmative) < succ>	Pfam:ArdA	6	179	4.1e-05	4.2e-39	ArdA
				16 | 38	8e-50	ref|ZP_05615890.1| antirestriction protein [Faecalibacterium prausnitzii A2-165]
				30 | 24	2e-56	ref|YP_001087592.1| putative DNA primase [Clostridium difficile 630]
				43 | 85	6e-33	ref|ZP_00785316.1| TN916 ORF18-like protein lmo1108 [Streptococcus agalactiae COH1]
				44 | 87	4e-32	ref|ZP_03056723.1| antirestriction protein ArdA [Enterococcus faecalis OG1RF]
	7447	hypothetical protein		11 | 114	2e-87	ref|YP_002936734.1| ParB-like partition protein [Eubacterium rectale ATCC 33656]									bacterial cytoplasm= 0.349(Affirmative) < succ>	low complexity	77	88	-			Plasmid RK2 ParB preferentially cleaves single-stranded DNA. ParB also nicks supercoiled plasmid DNA preferably at sites with potential single-stranded character, like AT-rich regions and sequences that can form cruciform structures. ParB also exhibits 5-->3 exonuclease activity.
				31 | 161	1e-86	ref|ZP_02327875.1| Spo0J-like protein, ParB-like nuclease domain [Paenibacillus larvae subsp. larvae BRL-230010]										low complexity	133	161	-	2e-16	parB_part: ParB-like partition proteins
				34 | 31	6e-91	ref|YP_002907353.1| chromosome partitioning protein ParB [Corynebacterium kroppenstedtii DSM 44385]										low complexity	169	189	-	2.1e-17	ParBc
																ParB	201	291	1.69e-16
	7452	transcriptional regulator, AraC family protein		5 | 65	2e-48	ref|ZP_04857759.1| transcriptional regulator [Ruminococcus sp. 5_1_39B_FAA]									bacterial cytoplasm= 0.487(Affirmative) < succ>	HTH_ARAC	229	312	1.66e-20	3.3e-07	HTHARAC
				8 | 53	3e-49	ref|ZP_04805145.1| transcriptional regulator, AraC family [Clostridium cellulovorans 743B]														1.3e-05	HTH_AraC
	7457	conjugative transposon protein		9 | 1	2e-98	ref|ZP_05922531.1| conjugative transposon protein [Enterococcus faecium TC 6]									bacterial membrane= 0.387(Affirmative) < succ>	transmembrane	32	54	-		signal-peptide
				10 | 2	3e-97	ref|YP_001086838.1| conjugative transposon protein [Clostridium difficile 630]															transmembrane_regions
				59 | 43	5e-81	ref|ZP_00785336.1| TN916 ORF13-like protein lmo1103 [Streptococcus agalactiae COH1]
	7462	putative cell wall hydrolase		2 | 13	1e-110	ref|YP_001086839.1| putative cell wall hydrolase [Clostridium difficile 630]									bacterial outside= 0.300(Affirmative) < succ	transmembrane	7	29	-	6.6e-30	NLPC_P60
				5 | 48	1e-106	ref|ZP_04743724.1| NLP/P60 family protein [Roseburia intestinalis L1-82]										Pfam:SLT	56	161	0.013	5.6e-27	NLP/P60 FAMILY SECRETED PROTEIN
				36 | 50	1e-106	ref|NP_687940.1| Tn916, NLP/P60 family protein [Streptococcus agalactiae 2603V/R]										Pfam:NLPC_P60	226	332	5.7e-49		transmembrane_regions

## Sheet: CTn5-like
strain	ORF	Annotated funtion			E-value	first 50 results, only non C. diff									PSORT	SMART domain	AA start	AA end	E-value	PRODOM
R20291	1741	membrane protein precursor													bacterial membrane = 0.157(Affirmative) < succ>	transmembrane	7	29	-
																transmembrane	33	50	-
																transmembrane	62	84	-
	1742	putative conjugative transposon protein													bacterial cytoplasm= 0.297(Affirmative) < succ>					1e-21	>PD308104 (Closest domain: Q4L3T9_STAHJ 2-107) PLASMID PHAGE-RELATED PHAGE BACTERIOPHAGE-RELATED ORF ORF016 GK2917 ORF015
																				2e-12	DOMAIN REPLICATION N-TERMINAL A PLASMID INITIATOR >PD400605
phage insertion between AA328 and 329	1743	conjugal transfer protein		7 | 13	1e-158	ref|ZP_03079565.1| TraG/TraD family protein [Ureaplasma urealyticum serovar 9 str. ATCC 33175]									bacterial membrane= 0.463(Affirmative) < succ>					7e-41	PLASMID TRAG FAMILY TRANSFER ATPASE CONJUGAL INVOLVED PROTEIN TRAG/TRAD FAMILY
AA328 and 329				8 | 14	1e-158	gb|ACH85927.1| type IV secretory pathway protein VirD4 [Streptococcus pneumoniae]														9e-38	PLASMID TRAG VIRD4 TRANSFER PRECURSOR SIGNAL CONJUGAL TYPE IV CAG
																				4e-36	TRSK-LIKE FAMILY TRAG PLASMID
																				1e-29	FAMILY TRAG PLASMID TRSK-LIKE GBS1128 PCFC
																				3e-26	PLASMID TRAG VIRD4 TRANSFER PRECURSOR SIGNAL CONJUGAL TYPE IV TRANSMEMBRANE
	1744	site-specific recombinase		3 | 1	0	TnpX site-specific recombinase [Faecalibacterium prausnitzii A2-165]									bacterial cytoplasm= 0.538(Affirmative) < succ>	Resolvase	7	155	2.31e-33	8e-40	RECOMBINASE SITE-SPECIFIC N-TERMINAL:RECOMBINASE FAMILY RESOLVASE TNPX
				49 | 50	1e-148	gb|AAF66226.1|AF226276_1 TnpX [Clostridium difficile]					CD3770 (CTn7)					coiled coil	393	478	-	6e-37	RECOMBINASE SITE-SPECIFIC N-TERMINAL:RECOMBINASE RESOLVASE CHROMOSOME CASSETTE RECOMBINASE RESOLVASE B DNA
																low complexity	544	558	-	3e-28	RECOMBINASE SITE-SPECIFIC RESOLVASE CHROMOSOME N-TERMINAL:RECOMBINASE CASSETTE RESOLVASE DNA INTEGRASE B
																coiled coil	564	601	-	1e-19	RECOMBINASE RESOLVASE SITE-SPECIFIC N-TERMINAL:RECOMBINASE DNA CHROMOSOME RECOMBINASE CASSETTE RESOLVASE A
	1745	hypothetical protein		14 | 36	8e-37	ref|ZP_05854178.1| TnpV protein [Blautia hansenii DSM 20583]									bacterial cytoplasm= 0.455(Affirmative) < succ>					2e-19	TNPV PLASMID
	1746	hypothetical protein													bacterial cytoplasm= 0.221(Affirmative) < succ>
	1747	conjugative transposon regulatory protein		9 | 69	3e-19	ref|ZP_04743879.1| putative transcriptional regulator [Roseburia intestinalis L1-82]									bacterial membrane= 0.117(Affirmative) < succ>	HTH_XRE	16	71	0.000978	2e-20	PLASMID
				11 | 54	1e-19	gb|ABB17546.1| transcriptional regulator [Enterococcus faecalis]										plasmid copy control				6e-15	TRANSCRIPTIONAL PLASMID ORF26 TN916 REGULATOR ORF9 REGULATOR
				25 | 29	2e-20	ref|YP_133686.1| hypothetical protein Tn916_16 [Enterococcus faecalis] gb|AAC36976.1| ORF9 [Enterococcus faecalis]
				27 | 127	3e-18	ref|YP_051482.1| putative prophage regulatory ptotein [Pectobacterium atrosepticum SCRI1043]
				37 | 163	7e-18	ref|YP_003183912.1| transcriptional regulator, XRE family [Alicyclobacillus acidocaldarius subsp. acidocaldarius DSM 446]
	1748	two-component response regulator		1 | 82	1e-101	ref|ZP_04172650.1| Two-component response regulator [Bacillus cereus AH1273]									bacterial cytoplasm= 0.070(Affirmative) < succ>	REC	19	129	4.08e-43	4e-25	TRANSCRIPTION REGULATOR RESPONSE TWO-COMPONENT REGULATORY DNA-BINDING SENSORY TRANSDUCTION PHOSPHORYLATION REGULATION
				16 | 191	2e-98	ref|ZP_04305678.1| Two-component response regulator vanR [Bacillus cereus 172560W]										Trans_reg_C	167	243	6.01e-23	6e-19	TRANSCRIPTION REGULATORY DNA-BINDING REGULATOR TWO-COMPONENT RESPONSE REGULATION SENSORY TRANSDUCTION PHOSPHORYLATION
				18 | 244	2e-97	emb|CAA04532.1| arcA [Lactococcus lactis]										Ecoli flagellar motor domain				7e-05	TRANSCRIPTION RECEIVER REGULATOR RESPONSE DNA-BINDING PHOSPHORYLATION TRANSDUCTION SENSORY REGULATION PILUS
				19 | 12	1e-103	ref|YP_002458147.1| two component transcriptional regulator, winged helix family [Desulfitobacterium hafniense DCB-2]										DNA binding				0.0006	HELIX TRANSCRIPTIONAL COMPONENT REGULATOR FAMILY WINGED TWO
				34 | 242	2e-97	gb|ABB80126.1| SubR [Bacillus subtilis]														0.002	RESPONSE TWO-COMPONENT REGULATOR
	1749	Histidine Kinase A		1 | 84	2e-95	ref|YP_002938780.1| sensory transduction histidine kinase [Eubacterium rectale ATCC 33656]
				6 | 128	2e-93	ref|ZP_03225552.1| YclK [Bacillus coahuilensis m4-4]
				26 | 220	2e-90	ref|ZP_05549504.1| two-component system sensor [Lactobacillus crispatus 125-2-CHN]
	1750	lantibiotic abc transporter		2 | 9	1e-116	ref|ZP_05854214.1| bacitracin transport ATP-binding protein BcrA [Blautia hansenii DSM 20583]									bacterial cytoplasm = 0.433(Affirmative) < succ>	AAA	43	226	1.93e-09	2e-14	ATP-BINDING MEMBRANE NUCLEOTIDE-BINDING ABC TRANSPORTER INNER TRANSPORTER ATPASE HYDROLASE COMPONENT
				9 | 65	1e-111	ref|YP_001087580.1| putative lantibiotic ABC transporter,ATP-binding protein [Clostridium difficile 630] CD1097										low complexity	269	280	-	2e-09	ATP-BINDING NUCLEOTIDE-BINDING ABC MEMBRANE TRANSPORTER TRANSPORTER BACITRACIN BCRA PRECURSOR SIGNAL
				27 | 1	1e-117	sp|P42332|BCRA_BACLI RecName: Full=Bacitracin transport ATP-binding protein bcrA gb|AAA99504.1| TTG start codon [Bacillus licheniformis]														5e-06	ABC NUCLEOTIDE-BINDING REPEAT ATP-BINDING TRANSPORTER C56E6.5 TRANSPORTER-LIKE LD11139P CG11069-PA
				28 | 2	1e-117	gb|ABB80128.1| SubE [Bacillus subtilis]														2e-05	ATP-BINDING NUCLEOTIDE-BINDING ABC BACITRACIN MEMBRANE TRANSPORTER TRANSPORTER BCRA MULTIDRUG ABC-TYPE
	1751	lantibiotic abc transporter		9 | 9	8e-29	|ZP_03131388.1| ABC-2 type transporter [Chthoniobacter flavus Ellin428									bacterial membrane= 0.592 (Affirmative) < succ>	transmembrane	17	39	-	1e-05	PERMEASE MEMBRANE ABC TRANSPORTER PROTEIN ACETOIN POSSIBLE LANTIBIOTIC TRANSPORTER BACTERIOCIN
				13 | 38	4e-27	ref|YP_582503.1| ABC-type multidrug transport system permease component [Ralstonia metallidurans CH34]										transmembrane	59	81	-
																transmembrane	102	124	-
																transmembrane	144	166	-
																transmembrane	171	193	-
																transmembrane	230	252	-
	1752	lantibiotic abc transporter		8 | 43	5e-17	ref|ZP_05392826.1| putative lantibiotic ABC transporter, permease protein [Clostridium carboxidivorans P7]									bacterial membrane= 0.544(Affirmative) < succ>	transmembrane	16	38	-	0.0006	PERMEASE BACITRACIN BCRB RESISTANCE MEMBRANE ABC TRANSMEMBRANE TRANSPORTER PLASMID ANTIBIOTIC
																transmembrane	58	75	-	0.001	PERMEASE MEMBRANE ABC TRANSPORTER PROTEIN ACETOIN POSSIBLE LANTIBIOTIC TRANSPORTER BACTERIOCIN
																transmembrane	102	124	-	0.003	PERMEASE MEMBRANE PROTEIN ABC TRANSPORTER BACITRACIN PRECURSOR SIGNAL SYSTEM COMPONENT
																transmembrane	139	161	-
																transmembrane	168	190	-
																transmembrane	215	237	-
																low complexity	247	257	-
	1753	hypothetical protein		20 | 17	4e-25	ref|YP_001254654.1| lipoprotein [Clostridium botulinum A str. ATCC 3502]									(Not Clear)
	1754	rna polymerase, sigma-24 subunit		38 | 12	0.033	ref|YP_001353717.1| ECF subfamily RNA polymerase sigma factor [Janthinobacterium sp. Marseille]									bacterial membrane= 0.109(Affirmative) < succ>
	1755	RNA polymerase sigma factor		2 | 48	8e-34	ref|YP_002881287.1| RNA polymerase, sigma-24 subunit, ECF subfamily [Beutenbergia cavernae DSM 12333]									bacterial cytoplasm= 0.273(Affirmative) < succ>
				5 | 140	3e-32	ref|ZP_05224140.1| RNA polymerase sigma factor RpoE [Mycobacterium intracellulare ATCC 13950]
	1756	rna polymerase, sigma-24 subunit		1 | 36	1e-36	ref|YP_001580359.1| RNA polymerase sigma factor RpoE [Burkholderia multivorans ATCC 17616]									bacterial cytoplasm= 0.226(Affirmative) < succ>	low complexity	86	105	-
																low complexity	147	154	-
	1757	hypothetical protein													bacterial cytoplasm= 0.467(Affirmative) < succ>	coiled coil	10	48	-
	1758	pseudogene		2 | 22	1e-85	ref|ZP_05615183.1| conjugal transfer protein TraA [Faecalibacterium prausnitzii A2-165]									bacterial cytoplasm= 0.113(Affirmative) < succ>	low complexity	18	32	-	1e-26	PLASMID MOBA/MOBL MOBILIZATION TRANSFER TRAA CONJUGAL CONJUGATION PROBABLE NICKING ENZYME
				6 | 5	1e-101	ref|ZP_05613306.1| MobA/MobL protein [Faecalibacterium prausnitzii A2-165]										coiled coil	447	475	-	3e-12	PLASMID TRAA MOBA/MOBL TRANSFER MOBILIZATION CONJUGAL NICKING ENZYME PROBABLE CONJUGATION
				14 | 2	1e-104	ref|ZP_05345709.3| putative nickase [Bryantella formatexigens DSM 14469]														2e-08	PLASMID MOBILIZATION MOBA/MOBL TRAA TRANSFER CONJUGAL NICKING CONJUGATION ENZYME PROBABLE
				48 | 86	5e-68	ref|NP_396650.2| OriT nicking enzyme, Dtr system [Agrobacterium tumefaciens str. C58]														2e-05	PLASMID FAMILY MOBILIZATION MOBA/MOBL
	1759	addiction module toxin		7 | 10	4e-25	ref|YP_002459643.1| addiction module toxin, RelE/StbE family [Desulfitobacterium hafniense DCB-2]									bacterial cytoplasm= 0.381(Affirmative)					5e-09	PLASMID SYSTEM STABILIZATION YAFQ PROPHAGE PZ12B AGR_C_1701P ORF13 EF0033 FAMILY
				18 | 80	1e-20	ref|ZP_00684447.1| Plasmid stabilization system [Xylella fastidiosa Ann-1]														2e-07	PLASMID SYSTEM STABILIZATION PROPHAGE PZ12B AGR_C_1701P ORF13 EF0033 FAMILY R3
	1760	addiction module antitoxin, relb/dinj family		5 | 5	2e-25	toxin-antitoxin system protein [Faecalibacterium prausnitzii A2-165]									bacterial cytoplasm= 0.193(Affirmative)					1e-15	DNA-DAMAGE-INDUCIBLE RELB ANTITOXIN PLASMID J J NEGATIVE DAMAGE-INDUCIBLE REGULATOR TRANSLATION
				7 | 69	8e-18	ref|ZP_01544690.1| DNA-damage-inducible protein J, RelB antitoxin [Oenococcus oeni ATCC BAA-1163]														3e-07	ANTITOXIN RELB
				10 | 6	6e-24	ref|ZP_04340262.1| addiction module antitoxin, RelB/DinJ family [Dethiosulfovibrio peptidovorans DSM 11002]
	1761	hypothetical protein													bacterial cytoplasm= 0.479(Affirmative)					0.0001	RECOMBINASE
	1762	phage protein		9 | 4	2e-47	ref|ZP_05614673.1| phage protein [Faecalibacterium prausnitzii A2-165]									bacterial cytoplasm= 0.173(Affirmative) < succ>	low complexity	139	159	-	6e-25	REPEAT ORF015 PHAGE ORF 20-LIKE ORGANIZER REPLISOME ORF014 CAC1934 GP49
				30 | 56	1e-28	ref|ZP_05664758.1| phage protein [Enterococcus faecium 1,231,501]														0.006	SPR0940 PHAGE-ASSOCIATED SP1038
				32 | 48	3e-29	ref|ZP_04745519.1| replication initiator protein A [Roseburia intestinalis L1-82
	1763	replicative dna helicase		1 | 246	1e-64	ref|ZP_02906740.1| IstB domain protein ATP-binding protein [Burkholderia ambifaria MEX-5]									cytoplasm= 0.600(Affirmative) < succ>	coiled coil	7	35	-	3e-42	ATP-BINDING REPLICATION NUCLEOTIDE-BINDING DNA PRIMOSOMAL HELICASE DNAI DNAC PRIMOSOME COMPONENT
				4 | 150	1e-66	ref|YP_001600695.1| putative tranposase [Gluconacetobacter diazotrophicus PAl 5]														1e-06	NUCLEOTIDE-BINDING ATPAS ATP-BINDING
				37 | 148	1e-66	ref|ZP_04027511.1| DNA replication protein [Tsukamurella paurometabola DSM 20162]
	1764	hypothetical protein													bacterial cytoplasm = 0.568(Affirmative) < succ>	low complexity	96	107	-
	1765	hypothetical protein		8 | 25	6e-41	ref|ZP_05614087.1| TnpV protein [Faecalibacterium prausnitzii A2-165]									bacterial cytoplasm= 0.199(Affirmative) < succ>					2e-18	TNPV PLASMID
				64 | 78	1e-32	gb|AAF66227.1|AF226276_2 TnpV [Clostridium difficile]
	1766	yobd transcription regulator		10 | 11	2e-75	ref|ZP_04746193.2| toxin-antitoxin system, antitoxin component, Xre family [Roseburia intestinalis L1-82]									bacterial cytoplasm= 0.289(Affirmative) < succ>	HTH_XRE	10	67	8.12e-10
				22 | 216	5e-17	ref|YP_001559074.1| XRE family transcriptional regulator [Clostridium phytofermentans ISDg]									bacterial plasmid copy control protein	low complexity	252	261	-
	1767	hypothetical protein		20 | 12	5e-24	ref|ZP_05614088.1| putative ferredoxin [Faecalibacterium prausnitzii A2-165]									bacterial cytoplasm= 0.467(Affirmative) < succ>	low complexity	136	147	-
	1768	hypothetical protein		24 | 51	1e-41	ref|ZP_05855747.1| putative plasmid recombination enzyme [Blautia hansenii DSM 20583]									bacterial cytoplasm= 0.533(Affirmative) < succ>	coiled coil	167	205	-
				25 | 59	9e-40	ref|YP_001375536.1| mobilization protein [Bacillus cereus subsp. cytotoxis NVH 391-98
				27 | 65	3e-37	ref|YP_001653978.1| mobilization protein MobFR12 [Bacillus thuringiensis]
				28 | 69	8e-36	emb|CAI40622.1| Mob protein [Bacillus mycoides]
	1769	hypothetical protein		1 | 9	3e-69	ref|YP_001673238.1| DNA primase [Shewanella halifaxensis HAW-EB4]									bacterial cytoplasm= 0.295(Affirmative) < succ>	ZnF_CHCC	1	51	1.01e-13	3e-10	TRANSFERASE NUCLEOTIDYLTRANSFERASE ZINC DNA-DIRECTED RNA METAL-BINDING POLYMERASE
	1770	hypothetical protein		11 | 172	9e-74	ref|ZP_04745804.1| putative virulence-associated protein E [Roseburia intestinalis L1-82]									bacterial cytoplasm= 0.374(Affirmative) < succ>					1e-22	VIRULENCE-ASSOCIATED E HELICASE PHAGE SIMILAR DOMAIN PROPHAGE DNA INACTIVATED PLASMID
				43 | 54	2e-88	ref|ZP_05614072.1| putative pyocin R2_PP, TraC domain protein [Faecalibacterium prausnitzii A2-165]														1e-06	VIRULENCE-ASSOCIATED E HELICASE PHAGE SIMILAR DOMAIN PROPHAGE LP3 8 P-LOOP
	1771	hypothetical protein		5 | 232	1e-115	ref|ZP_04745912.1| TnpX site-specific recombinase [Roseburia intestinalis L1-82]									bacterial cytoplasm = 0.228(Affirmative) < succ>	Resolvase	12	162	1.04e-35	2e-29	RECOMBINASE SITE-SPECIFIC N-TERMINAL:RECOMBINASE FAMILY RESOLVASE TNPX RESOLVASE RECOMBINASE PLASMID TNDX
				38 | 59	1e-142	ref|YP_002936706.1| cassette chromosome recombinase B [Eubacterium rectale ATCC 33656]										coiled coil	411	435	-	3e-12	RECOMBINASE RESOLVASE SITE-SPECIFIC N-TERMINAL:RECOMBINASE DNA CHROMOSOME RECOMBINASE CASSETTE RESOLVASE A
				41 | 64	1e-142	ref|ZP_05613805.1| site-specific recombinase, resolvase family [Faecalibacterium prausnitzii A2-165]														6e-10	RECOMBINASE SITE-SPECIFIC N-TERMINAL:RECOMBINASE DNA FAMILY RESOLVASE YEFB RECOMBINASE RESOLVASE
				47 | 127	1e-129	ref|YP_003218236.1| site-specific recombinase, resolvase family, putative CD1744[Clostridium difficile R20291]														5e-09	SITE-SPECIFIC N-TERMINAL:RECOMBINASE RECOMBINASE FAMILY RESOLVASE TNPX RECOMBINASE RESOLVASE DNA LIN1623
																				1e-06	SITE-SPECIFIC RECOMBINASE RESOLVASE N-TERMINAL:RECOMBINASE RESOLVASE RECOMBINASE DNA CHROMOSOME CASSETTE N-TERMINAL
	1772	hypothetical protein		7 | 3	1e-158	ref|YP_002939438.1| site-specific recombinase [Eubacterium rectale ATCC 33656									bacterial cytoplasm= 0.179(Affirmative) < succ>	Resolvase	8	157	3.12e-30	2e-33	RECOMBINASE SITE-SPECIFIC N-TERMINAL:RECOMBINASE FAMILY RESOLVASE TNPX RESOLVASE RECOMBINASE PLASMID TNDX
				25 | 105	1e-140	ref|YP_003218236.1| site-specific recombinase, resolvase family, putative [Clostridium difficile R20291]										coiled coil	402	427	-	6e-13	RECOMBINASE SITE-SPECIFIC N-TERMINAL:RECOMBINASE RESOLVASE CHROMOSOME CASSETTE RECOMBINASE RESOLVASE B DNA
																coiled coil	450	482	-	4e-11	RECOMBINASE SITE-SPECIFIC N-TERMINAL:RECOMBINASE LIN1623 PLASMID FAMILY RESOLVASE RESOLVASE
																				4e-10	RECOMBINASE RESOLVASE SITE-SPECIFIC N-TERMINAL:RECOMBINASE DNA CHROMOSOME RECOMBINASE CASSETTE RESOLVASE A
																				4e-10	SITE-SPECIFIC N-TERMINAL:RECOMBINASE RECOMBINASE FAMILY RESOLVASE TNPX RECOMBINASE RESOLVASE DNA LIN1623
	1773	hypothetical protein		1 | 43	5e-36	ref|YP_003184707.1| RNA polymerase, sigma 28 subunit, SigE [Alicyclobacillus acidocaldarius subsp. acidocaldarius DSM 446]									bacterial cytoplasm= 0.295(Affirmative) < succ>	low complexity	79	89	-	2e-16	TRANSCRIPTION DNA-BINDING REGULATION LIN1619 EF0004 LMO1099 PLASMID
				3 | 160	2e-33	ref|YP_001125115.1| sporulation sigma factor SigE [Geobacillus thermodenitrificans NG80-2]														3e-12	RNA POLYMERASE FACTOR SIGMA TRANSCRIPTION SIGMA-70 DNA-BINDING DNA-DIRECTED REGULATION TRANSFERASE
																				0.0007	TRANSCRIPTION ORF7 DNA-BINDING REGULATION 1-24 TN916 SAG0919 PLASMID TRANSPOSON TETM
	1774	hypothetical protein		1 | 244	1e-151	ref|ZP_05646719.1| ribosomal RNA large subunit methyltransferase N [Enterococcus casseliflavus EC30									bacterial cytoplasm= 0.468(Affirmative)	Elp3	87	292	0.0106	3e-17	HOMOLOG B.SUBTILIS PREDICTED REDOX ENZYME FE-S-CLUSTER YLON
				3 | 4	1e-159	ref|ZP_04391850.1| radical SAM enzyme, Cfr family [Geobacillus sp. Y412MC52]										MoaA, NifB, PqqE, coproporphyrinogen III oxidase,eukaryotic elongator subunit, Elp-3. Some members of the family are methyltransferases.				7e-16	SAM RADICAL FAMILY CFR ENZYME ENZYME FE-S-CLUSTER REDOX YFGB METAL-BINDING
				4 | 98	1e-154	ref|ZP_04562977.1| 23S rRNA methyltransferase [Citrobacter sp. 30_2]										biotin synthase and MiaB families, and includes a representative in the				7e-15	TP0068 SAM RADICAL
				23 | 76	1e-154	ref|YP_001421152.1| YloN [Bacillus amyloliquefaciens FZB42]										eukaryotic elongator subunit, Elp-3. Some members of				6e-10	FLORFENICOL RESISTANCE MLR4359
																the family are methyltransferases.				2e-07	SAM RADICAL FAMILY CFR ENZYME ENZYME FE-S-CLUSTER REDOX YFGB METAL-BINDING
																				8e-07	SAM RADICAL FE-S-CLUSTER FAMILY REDOX ENZYMERADICAL ENZYME PREDICTED
	1775	hypothetical protein		8 | 32	2e-53	ref|ZP_04744767.2| putative DNA-binding response regulator [Roseburia intestinalis L1-82]									bacterial cytoplasm= 0.029(Affirmative)	LytTR	97	189	7.82e-22	7e-10	TRANSCRIPTION REGULATOR RESPONSE TWO-COMPONENT REGULATORY DNA-BINDING SENSORY TRANSDUCTION PHOSPHORYLATION REGULATION
				9 | 40	1e-52	ref|ZP_05816934.1| response regulator of the LytR/AlgR family [Sanguibacter keddieii DSM 10542]										variety of bacterial transcriptional regulators				9e-07	TRANSCRIPTION DNA-BINDING TWO-COMPONENT REGULATORY REGULATOR RESPONSE SYSTEM SENSORY TRANSDUCTION PHOSPHORYLATION
				11 | 93	9e-51	ref|ZP_05345412.1| putative two-component response regulator [Bryantella formatexigens DSM 14469]										binds to a specific DNA sequence pattern				2e-06	TRANSCRIPTION DNA-BINDING PHOSPHORYLATION SENSORY REGULATION RESPONSE TRANSDUCTION REGULATOR RECEIVER SYSTEM
				25 | 99	2e-50	ref|YP_001089771.1| two-component response regulator [Clostridium difficile 630] CD3325														0.0003	TRANSCRIPTION RECEIVER DNA-BINDING SYSTEM TWO-COMPONENT REGULATOR PHOSPHORYLATION TRANSDUCTION SENSORY REGULATORY
	1776	conjugal transfer protein		3 | 14	9e-29	ref|YP_001086880.1| putative single-strand binding protein [Clostridium difficile 630] CD0413									bacterial cytoplasm= 0.170(Affirmative)	low complexity	92	103	-
				7 | 13	8e-29	ref|ZP_03915007.1| conjugal transfer protein (possible single-stranded DNA binding protein) [Anaerococcus lactolyticus ATCC 51172
	1777	hypothetical protein		6 | 4	3e-44	ref|ZP_05614060.1| TnpV protein [Faecalibacterium prausnitzii A2-165]									bacterial cytoplasm= 0.282(Affirmative)	coiled coil	67	100	-	7e-16	TNPV PLASMID
				82 | 74	3e-34	gb|AAF66227.1|AF226276_2 TnpV [Clostridium difficile
	1778	hypothetical protein		1 | 51	2e-37	ref|YP_002432822.1| transcriptional regulator, MarR family [Desulfatibacillum alkenivorans AK-01]									bacterial cytoplasm= 0.224(Affirmative)	HTH_MARR	19	119	2.68e-15	8e-05	TRANSCRIPTION DNA-BINDING REGULATION TRANSCRIPTIONAL MARR FAMILY REGULATOR REGULATOR REGULATORY PROTEIN
				4 | 1	4e-39	ref|ZP_01991121.1| transcriptional regulator OhrR [Vibrio parahaemolyticus AQ3810]										low complexity	131	142	-	0.0002	TRANSCRIPTION TRANSCRIPTIONAL DNA-BINDING REGULATION REGULATOR
				10 | 250	4e-34	ref|ZP_05404058.2| accessory protein Z [Mitsuokella multacida DSM 20544]										transcription regulators of the marR/slyA family				0.006	TRANSCRIPTION TRANSCRIPTIONAL DNA-BINDING REGULATION REGULATOR FAMILY MARR REGULATOR
				36 | 71	6e-37	ref|ZP_04403870.1| organic hydroperoxide resistance transcriptional regulator [Vibrio cholerae TMA 21]										involved in the development of antibiotic resistance
	1779	hypothetical protein		2 | 244	1e-111	ref|ZP_03728308.1| MATE efflux family protein [Dethiobacter alkaliphilus AHT 1]									bacterial membrane= 0.455(Affirmative)	transmembrane	7	26	-	3e-10	MATE EFFLUX MEMBRANE MULTIDRUG EXTRUSION ANTIMICROBIAL MULTI RESISTANCE TRANSMEMBRANE PUMP
				4 | 44	1e-122	ref|YP_001302562.1| putative Na+-driven multidrug efflux pump [Parabacteroides distasonis ATCC 8503]										transmembrane	41	63	-	7e-08	MATE EFFLUX MULTIDRUG MEMBRANE EXTRUSION ANTIMICROBIAL MULTI PUMP FAMILY RESISTANCE
				17 | 52	1e-122	ref|ZP_05760534.1| putative Na+-driven multidrug efflux pump [Bacteroides sp. D2]										transmembrane	84	106	-	3e-06	MA2694
																transmembrane	126	148	-	4e-05	EFFLUX MATE MULTIDRUG PUMP ANTIMICROBIAL EXTRUSION MULTI FAMILY MEMBRANE TRANSMEMBRANE
																transmembrane	155	177	-	0.0005	MATE EFFLUX MEMBRANE MULTIDRUG EXTRUSION ANTIMICROBIAL MULTI RESISTANCE TRANSMEMBRANE PUMP
																transmembrane	182	204	-
																transmembrane	225	247	-
																transmembrane	260	282	-
																transmembrane	307	326	-
																transmembrane	341	363	-
																transmembrane	376	398	-
																transmembrane	403	425	-
	1780	hypothetical protein		5 | 19	1e-75	ref|ZP_05613816.1| toxin-antitoxin system, antitoxin component, Xre family [Faecalibacterium prausnitzii A2-165]									bacterial cytoplasm= 0.395(Affirmative) < succ>	HTH_XRE	10	66	9.33e-10
				17 | 13	3e-77	ref|ZP_05614062.1| prophage LambdaBa04, DNA-binding protein [Faecalibacterium prausnitzii A2-165]										DNA binding helix-turn helix proteins that include a bacterial
				36 | 199	2e-18	ref|ZP_01666639.1| putative prophage repressor [Thermosinus carboxydivorans Nor1]										plasmid copy control protein, bacterial methylases, various bacteriophage transcription control proteins
	1781	hypothetical protein		1 | 4	9e-35	ref|ZP_05854185.1| phage protein [Blautia hansenii DSM 20583]									bacterial membrane= 0.361(Affirmative)
				19 | 16	0.00888885	ref|ZP_05615274.1| replication-associated protein RepA [Faecalibacterium prausnitzii A2-165]
				26 | 91	3e-26	ref|ZP_04745519.1| replication initiator protein A [Roseburia intestinalis L1-82]
	1782	hypothetical protein													bacterial cytoplasm 0.619(Affirmative) < succ>	coiled coil	3	41	-	3e-05	PLASMID ORF00003-LIKE ORF40 ORF00003
																low complexity	84	94	-
	1783	hypothetical protein													bacterial cytoplasm0.349(Affirmative) < succ>
	1784	hypothetical protein		8 | 13	4e-66	ref|YP_002936711.1| putative conjugal transfer protein [Eubacterium rectale ATCC 33656]									bacterial cytoplasm0.201(Affirmative) < succ>	coiled coil	124	170	-	2e-22	PLASMID MOBA/MOBL MOBILIZATION TRANSFER TRAA CONJUGAL CONJUGATION PROBABLE NICKING ENZYME
				13 | 23	4e-63	ref|ZP_05613810.1| putative nickase [Faecalibacterium prausnitzii A2-165]										low complexity	280	297	-	4e-05	PLASMID FAMILY MOBILIZATION MOBA/MOBL
				27 | 5	2e-70	ref|ZP_05614054.1| putative mobilization protein MobA [Faecalibacterium prausnitzii A2-165]										coiled coil	323	355	-
	1785	pseudogene				emb|CBA04067.1| DNA primase [Neisseria meningitidis alpha153]
	1786	hypothetical protein		9 | 9	1e-124	ref|ZP_05613808.1| virulence-associated E [Faecalibacterium prausnitzii A2-165]									bacterial cytoplasm= 0.461(Affirmative	low complexity	74	86	-	3e-23	VIRULENCE-ASSOCIATED E HELICASE PHAGE SIMILAR DOMAIN PROPHAGE DNA INACTIVATED PLASMID
				25 | 41	4e-97	ref|ZP_05614072.1| putative pyocin R2_PP, TraC domain protein [Faecalibacterium prausnitzii A2-165]														9e-09	VIRULENCE-ASSOCIATED E HELICASE PHAGE SIMILAR DOMAIN PROPHAGE LP3 8 P-LOOP
	1787	hypothetical protein													bacterial membrane= 0.312(Affirmative) < succ>	transmembrane	39	61	-
	1788	hypothetical protein		13 | 15	1e-160	ref|YP_002936706.1| cassette chromosome recombinase B [Eubacterium rectale ATCC 33656]									bacterial cytoplasm= 0.224(Affirmative) < succ>	Resolvase	22	171	8.03e-42	3e-20	RECOMBINASE SITE-SPECIFIC N-TERMINAL:RECOMBINASE FAMILY RESOLVASE TNPX RESOLVASE RECOMBINASE PLASMID TNDX
				15 | 18	1e-160	ref|ZP_05613805.1| site-specific recombinase, resolvase family [Faecalibacterium prausnitzii A2-165]										coiled coil	415	446	-	5e-10	SITE-SPECIFIC RECOMBINASE RESOLVASE N-TERMINAL:RECOMBINASE RESOLVASE RECOMBINASE DNA CHROMOSOME CASSETTE N-TERMINAL
				139 | 94	1e-135	gb|AAF66226.1|AF226276_1 TnpX [Clostridium difficile]														6e-08	RECOMBINASE SITE-SPECIFIC RESOLVASE CHROMOSOME N-TERMINAL:RECOMBINASE CASSETTE RESOLVASE DNA INTEGRASE B
																				8e-08	RECOMBINASE RESOLVASE SITE-SPECIFIC N-TERMINAL:RECOMBINASE DNA CHROMOSOME RECOMBINASE CASSETTE RESOLVASE A
	1791	hypothetical protein		2 | 3	1e-140	ref|YP_001086886.1| hypothetical protein CD0419 [Clostridium difficile 630									bacterial membrane= 0.552(Affirmative) < succ>	low complexity	179	198	-	2e-11	M23B FAMILY PEPTIDASE PLASMID PEPTIDASE M23/M37
				7 | 9	1e-132	ref|ZP_03915456.1| conjugative transposon cell wall hydrolase [Anaerococcus lactolyticus ATCC 51172]										low complexity	205	223	-
				14 | 24	1e-117	gb|ACH85938.1| NlpC/P60 family protein [Streptococcus pneumoniae]										transmembrane	363	385	-
				28 | 87	3e-96	ref|ZP_05614082.1| peptidase, M23/M37 family [Faecalibacterium prausnitzii A2-165										low complexity	391	402	-
				44 | 183	1e-69	ref|ZP_00785340.1| TN916 ORF14-like protein lmo1104 [Streptococcus agalactiae COH1]										low complexity	485	500	-
																low complexity	652	658	-
	1792	putative cell surface protein		8 | 26	2e-42	ref|YP_002744800.1| membrane protein [Streptococcus equi subsp. zooepidemicus]									bacterial membrane= 0.302(Affirmative) < succ>	transmembrane	12	34	-	1e-09	PRECURSOR SIGNAL
				17 | 1767	1e-08	gb|ABG48500.1| titin a [Danio rerio]										low complexity	118	135	-	0.0004	PLASMID BACTERIOCIN BACTERIOCIN-LIKE
																coiled coil	144	239	-
																low complexity	262	304	-
																low complexity	421	449	-
																transmembrane	452	474	-
	1793	DNA topoisomerase		5 | 40	0	ref|YP_001086889.1| putative DNA topoisomerase [Clostridium difficile 630]									bacterial cytoplasm= 0.087(Affirmative) < succ>	TOPRIM	1	124	2.07e-20	7e-16	TOPOISOMERASE ISOMERASE DNA I III ENZYME DNA-BINDING METAL-BINDING ZINC-FINGER ZINC
				6 | 57	0	ref|YP_002744799.1| DNA topoisomerase [Streptococcus equi subsp. zooepidemicus]										TOP1Bc	124	214	4.15e-34	2e-13	DNA TOPOISOMERASE ISOMERASE TYPE PLASMID I IA PROBABLE TOPOISOMERASE-LIKE OMEGA-PROTEIN
																TOP1Ac	252	518	6.55e-64	2e-12	TOPOISOMERASE ISOMERASE DNA III PLASMID I TOPB TRAE IA DNA-BINDING
																				3e-10	TOPOISOMERASE ISOMERASE DNA I III ENZYME DNA-BINDING OMEGA-PROTEIN UNTWISTING RELAXING
																				4e-10	TOPOISOMERASE DNA ISOMERASE III ENZYME I PLASMID ZINC DNA-BINDING METAL-BINDING
	1794	hypothetical protein		1 | 8	1e-77	ref|YP_001086890.1| hypothetical protein CD0422 [Clostridium difficile 630]									bacterial cytoplasm= 0.268(Affirmative) < succ>					5e-22	ORF014 WITH SIMILARITIES FN0642
				23 | 41	5e-70	ref|YP_240185.1| ORF014 [Staphylococcus phage EW]														1e-16	ORF014 WITH SIMILARITIES FN0642
				28 | 76	1e-57	ref|ZP_05628422.1| KilA domain protein [Fusobacterium sp. D12]														8e-12	ORF014 WITH SIMILARITIES
																				8e-12	ORF014 WITH SIMILARITIES
	1795	putative helicase														coiled coil	240	267	-	3e-49	HELICASE PLASMID HELICASE C-TERMINAL METHYLTRANSFERASE METHYLASE DNA FAMILY SNF2 CPP14
																coiled coil	614	644	-	1e-41	HELICASE PLASMID HELICASE METHYLTRANSFERASE C-TERMINAL METHYLASE DNA FAMILY SNF2 TRANSFERASE
																low complexity	748	763	-	8e-37	HELICASE PLASMID HELICASE C-TERMINAL METHYLTRANSFERASE METHYLASE DNA FAMILY SNF2 CPP14
																low complexity	894	905	-	5e-34	HELICASE HELICASE C-TERMINAL NUCLEOTIDE-BINDING ATP-BINDING SNF2-RELATED:HELICASE PLASMID SNF2 FAMILY ATP-DEPENDENT
																low complexity	918	930	-	1e-30	HELICASE PLASMID HELICASE C-TERMINAL METHYLTRANSFERASE METHYLASE DNA FAMILY SNF2 DOMAIN
																DEXDc	1899	2170	4.85e-11	2e-25	HELICASE PLASMID HELICASE C-TERMINAL METHYLTRANSFERASE METHYLASE FAMILY SNF2 DNA DOMAIN
																HELICc	2335	2425	4.74e-05	8e-25	HELICASE PLASMID HELICASE METHYLTRANSFERASE METHYLASE C-TERMINAL DNA FAMILY SNF2 TRANSFERASE
																coiled coil	2634	2689	-	2e-24	HELICASE PLASMID HELICASE METHYLTRANSFERASE METHYLASE C-TERMINAL DNA FAMILY SNF2 TRANSFERASE
																low complexity	2891	2906	-	4e-21	METHYLTRANSFERASE TRANSFERASE RESTRICTION METHYLASE MODIFICATION TYPE DNA SYSTEM ADENINE-SPECIFIC ENZYME
23M63	16796	hypothetical protein		3 | 217	5e-30	ref|YP_175291.1| sporulation sigma factor SigF [Bacillus clausii KSM-K16]									bacterial cytoplasm= 0.428(Affirmative) < succ>	Pfam:Sigma70_r4_2	76	129	0.029	Interpro
																Pfam:Sigma70_r4	82	131	0.016
	16801	hypothetical protein		43 | 48	1e-31	ref|YP_002746530.1| ABC transporter permease protein [Streptococcus equi subsp. equi 4047]									bacterial membrane= 0.416(Affirmative) < succ>	Pfam:Trep_Strep	6	190	3.1e-44	1.8e-36	Trep_Strep: conserved hypothetical integral
				47 | 58	3e-31	ref|ZP_03994260.1| permease [Mobiluncus mulieris ATCC 35243]										Pfam:UPF0126	52	143	0.1
	16806	ABC-type cobalt transport system permease		1 | 11	4e-44	ref|YP_001393658.1| transporter protein [Clostridium kluyveri DSM 555									bacterial membrane= 0.633(Affirmative) < succ>	Pfam:CbiQ	2	204	1.3e-05	1.1e-12 [	Cobalt transport protein
				3 | 64	7e-42	ref|YP_001255929.1| cobalt ABC transporter permease [Clostridium botulinum A str. ATCC 3502]										transmembrane	216	238	-		transmembrane_regions
				6 | 140	8e-41	ref|NP_830041.1| cobalt transport protein cbiQ [Bacillus cereus ATCC 14579]															signal-peptide
				40 | 61	7e-42	ref|ZP_01726176.1| YbaF [Bacillus sp. B14905]
	16811	ABC transporter, ATP-binding protein		1 | 152	5e-81	ref|NP_968133.1| ABC-type dipeptide transport system, ATPase component [Bdellovibrio bacteriovorus HD100]									bacterial cytoplasm= 0.442(Affirmative) < succ>	AAA	27	233	9.36e-08	1e-07	ABC transporter related
																AAA	297	478	7.09e-08	9.5e-15	ABC_tran
	16816	ABC transporter, ATP-binding/permease protein		1 | 19	0	ref|ZP_02634520.1| ABC transporter, permease/ATP-binding protein [Clostridium perfringens B str. ATCC 3626]									bacterial membrane= 0.469(Affirmative) < succ>	Pfam:ABC_membrane	21	288	9.8e-06	4.3e-16	ABC_membrane
				18 | 138	0	ref|ZP_04777439.1| lipid A export ATP-binding/permease protein MsbA [Gemella haemolysans ATCC 10379]										AAA	356	542	1.55e-13	1e-15	ABC transporter related
				45 | 234	0	ref|ZP_01170838.1| YwjA [Bacillus sp. NRRL B-14911]
	16821	ABC transporter, ATP-binding/permease protein													bacterial membrane= 0.448(Affirmative) < succ>	Pfam:ABC_membrane	10	286	1.3e-12	4.3e-22	ABC_membrane
																AAA	353	539	2.56e-14	2.7e-21	ABC_tran
	16826	TetR family transcriptional regulator		3 | 49	3e-37	ref|YP_001784517.1| TetR family transcriptional regulator [Haemophilus somnus 2336]									bacterial cytoplasm= 0.337(Affirmative) < succ>	Pfam:TetR_N	13	59	1.4e-15	4.5e-14	TetR_N
				8 | 51	3e-37	ref|ZP_04575938.1| HTH-type transcriptional regulator arpR protein [Oxalobacter formigenes HOxBLS]										low complexity	96	107	-
				11 | 61	6e-37	ref|ZP_04578135.1| regulatory protein TtgR [Oxalobacter formigenes OXCC13]
				18 | 86	2e-36	ref|ZP_05973415.1| AcrAB operon repressor [Providencia rustigianii DSM 4541]
	16831	hypothetical protein		11 | 1	1e-25	ref|ZP_04018885.1| conjugative transposon mobilization protein [Finegoldia magna ATCC 53516]									bacterial cytoplasm= 0.481(Affirmative) < succ>	low complexity	16	30	-
				27 | 16	2e-21	ref|ZP_03915727.1| conjugative transposon mobilization protein [Anaerococcus lactolyticus ATCC 51172]
				34 | 38	5e-19	ref|ZP_01819959.1| Tn5252, Orf 9 protein [Streptococcus pneumoniae SP6-BS73]
				38 | 52	6e-18	ref|ZP_02718631.1| mobilization protein MobC family [Streptococcus pneumoniae CDC3059-06]
	16866	DNA-binding protein		12 | 90	1e-27	ref|YP_001088354.1| CD1848 conjugative transposon protein [Clostridium difficile 630]									bacterial cytoplasm= 0.289(Affirmative) < succ>	low complexity	23	45	-
																low complexity	70	81	-
																low complexity	120	131	-
																low complexity	144	157	-
	16881	putative replication initiation protein		3 | 4	5e-59	ref|YP_002746080.1| replication initiation protein [Streptococcus equi subsp. equi 4047]									bacterial cytoplasm= 0.258(Affirmative) < succ>	Pfam:RepA_N	14	89	8.3e-37	4.3e-26	Replication initiator A, N-terminal
				10 | 33	4e-41	ref|YP_002735957.1| phage protein [Streptococcus pneumoniae JJA]										low complexity	162	175	-
				47 | 214	1e-26	ref|NP_945250.1| DnaD protein [Streptococcus phage EJ-1]										replication initiator protein A
	16886	membrane protein		2 | 1	1e-15	ref|ZP_03914986.1| membrane protein [Anaerococcus lactolyticus ATCC 51172]									bacterial membrane = 0.153(Affirmative) < succ>	transmembrane	13	47	-		transmembrane_regions
				33 | 45	2e-06	ref|YP_001692238.1| putative lipoprotein precursor [Finegoldia magna ATCC 29328]										transmembrane	62	84	-		signal-peptide
	16891	hypothetical protein													bacterial cytoplasm= 0.397(Affirmative) < succ>
63Q42	17106	hypothetical protein		11 | 60	7e-58	ref|YP_862084.1| AhpC/TSA family protein [Gramella forsetii KT0803]									bacterial membrane= 0.219(Affirmative) < succ>	low complexity	10	21	-	1e-16	FAMILY REDOX-ACTIVE THIOREDOXIN CENTER
				12 | 245	3e-42	ref|YP_001194361.1| alkyl hydroperoxide reductase/ Thiol specific antioxidant/ Mal allergen [Flavobacterium johnsoniae UW101]										low complexity	290	305	-	5e-10	MEMBRANE THIOL:DISULFIDE BIOGENESIS CYTOCHROME REDOX-ACTIVE CENTER DSBE INTERCHANGE C-TYPE TRANSMEMBRANE
				41 | 22	1e-65	ref|YP_100008.1| thiol:disulfide interchange protein [Bacteroides fragilis YCH46]														1e-06	FAMILY REDOX-ACTIVE THIOREDOXIN CENTER
																				4e-06	FAMILY REDOX-ACTIVE THIOREDOXIN CENTER
	17111	hypothetical protein		11 | 1	1e-25	ref|ZP_04018885.1| conjugative transposon mobilization protein [Finegoldia magna ATCC 53516]									bacterial cytoplasm= 0.481(Affirmative) < succ>	low complexity	16	30	-	3e-07	ORF TN5252 PLASMID GBS1122 PCFF
				21 | 17	3e-21	ref|YP_001088378.1| CD1870 putative conjugative transposon mobilization protein [Clostridium difficile 630]
				26 | 14	1e-21	ref|ZP_03930772.1| mobilization protein [Anaerococcus tetradius ATCC 35098]
				34 | 38	5e-19	ref|ZP_01819959.1| Tn5252, Orf 9 protein [Streptococcus pneumoniae SP6-BS73]
				38 | 52	6e-18	ref|ZP_02718631.1| mobilization protein MobC family [Streptococcus pneumoniae CDC3059-06]
	17116	relaxase/mobilisation protein		3 | 2	7e-81	ref|ZP_02696018.1| putative conjugative transposon mobilization protein [Ureaplasma urealyticum serovar 13 str. ATCC 33698]									bacterial outside= 0.300(Affirmative) < succ>	low complexity	106	115	-	4e-29	PLASMID MOBILIZATION RLX RELAXASE/MOBILIZATION DOMAIN MOBA RLX-LIKE NUCLEASE HOMOLOG ORF2
				6 | 14	2e-77	ref|YP_001086893.1| CD0425 putative mobilization protein [Clostridium difficile 630]										low complexity	156	163	-	4e-27	PLASMID MOBILIZATION RELAXASE NUCLEASE RELAXASE/MOBILIZATION DOMAIN TRAI MOBA NICKASE DNA
				8 | 17	4e-77	ref|YP_002744794.1| relaxase/mobilisation protein [Streptococcus equi subsp. zooepidemicus]										coiled coil	314	345	-	0.0006	RLX-LIKE PLASMID MOBILIZATION/TRANSFER
				16 | 28	2e-73	emb|CAQ56294.1| relaxase [Streptococcus pyogenes
				21 | 26	6e-74	gb|ABR68878.1| type IV secretory pathway protein VirD2 [Streptococcus pneumoniae]
	17121	dead/deah box helicase domain-containing		3 | 3	0	ref|ZP_02696017.1| dead/deah box helicase domain protein [Ureaplasma urealyticum serovar 13 str. ATCC 33698]									bacterial cytoplasm= 0.375(Affirmative) < succ>	low complexity	5	16	-	0	HELICASE PLASMID C2 AGR_PTI_100P SCP1.205C ORF00041 ATU6048
				15 | 16	0	ref|ZP_02572701.1| helicase c2 [Salmonella enterica subsp. enterica serovar 4,[5],12:i:- str. CVM23701]										DEXDc	31	217	3.28e-08	3e-54	HELICASE PLASMID AGR_PTI_100P MUP065C SCP1.205C ORF00041 C2 ATU6048
				19 | 26	1e-161	ref|ZP_03391277.1| type III restriction enzyme, res subunit family [Capnocytophaga sputigena Capno]										HELICc2	350	478	1.58e-10	0.0002	HELICASE C2
	17126	hypothetical protein
	17131	hypothetical protein													bacterial cytoplasm= 0.455(Affirmative) < succ>	DEXDc	277	507	1.13e-11	1e-55	TYPE I HELICASE RESTRICTION-MODIFICATION SUBUNIT RESTRICTION SYSTEM DEAD/DEAH R BOX
																				4e-40	TYPE I HELICASE RESTRICTION-MODIFICATION SUBUNIT SYSTEM RESTRICTION DEAD/DEAH ENDONUCLEASE R
																				3e-33	TYPE I RESTRICTION-MODIFICATION HELICASE SUBUNIT RESTRICTION SYSTEM DEAD/DEAH ENDONUCLEASE R
																				3e-33	TYPE I HELICASE RESTRICTION-MODIFICATION SUBUNIT RESTRICTION SYSTEM DEAD/DEAH ENDONUCLEASE R
	17136	type I restriction-modification system		2 | 37	3e-86	ref|ZP_02696013.1| probable type I restriction-modification system [Ureaplasma urealyticum serovar 13 str. ATCC 33698]									bacterial cytoplasm= 0.307(Affirmative) < succ>	low complexity	177	191	-	1e-05	TYPE I RESTRICTION-MODIFICATION SPECIFICITY SUBUNIT SYSTEM S RESTRICTION ENDONUCLEASE DETERMINANT
				4 | 130	3e-79	ref|ZP_04479342.1| restriction endonuclease S subunit [Streptobacillus moniliformis DSM 12112]										low complexity	435	452	-	2e-05	SPECIFICITY TYPE I RESTRICTION SYSTEM SUBUNIT MODIFICATION RESTRICTION-MODIFICATION DNA S
				8 | 119	4e-80	ref|YP_001662851.1| restriction modification system DNA specificity subunit [Thermoanaerobacter sp. X514]														0.008	TYPE I SPECIFICITY RESTRICTION SUBUNIT S SYSTEM RESTRICTION-MODIFICATION ENZYME MODIFICATION
				16 | 281	9e-73	ref|YP_002603215.1| HsdS2 [Desulfobacterium autotrophicum HRM2
	17141	type I restriction-modification system		2 | 1	0	ref|ZP_02696012.1| type I restriction-modification system specificity subunit [Ureaplasma urealyticum serovar 13 str. ATCC 33698]									bacterial cytoplasm= 0.115(Affirmative) < succ>					6e-43	TYPE SYSTEM I METHYLATION SUBUNIT RESTRICTION-MODIFICATION
				6 | 8	0	ref|ZP_05738438.1| HsdM protein [Granulicatella adiacens ATCC 49175]														3e-27	METHYLTRANSFERASE I RESTRICTION-MODIFICATION TYPE SUBUNIT DNA SYSTEM METHYLASE M SYSTEM
				7 | 20	0	ref|ZP_05550563.1| type I restriction-modification system, M subunit [Fusobacterium sp. 3_1_36A2]														6e-26	RESTRICTION-MODIFICATION I SUBUNIT TYPE SYSTEM M DNA SYSTEM N-6 METHYLTRANSFERASE
																				2e-20	METHYLTRANSFERASE I RESTRICTION-MODIFICATION TYPE SUBUNIT DNA SYSTEM METHYLASE SYSTEM M
																				6e-19	METHYLTRANSFERASE I RESTRICTION-MODIFICATION TYPE SUBUNIT DNA SYSTEM METHYLASE SYSTEM M
	17146	DNA-binding protein		2 | 236	4e-14	ref|ZP_05392196.1| transcriptional regulator, XRE family [Clostridium carboxidivorans P7									bacterial cytoplasm= 0.336(Affirmative) < succ>	HTH_XRE	7	61	0.00964	1e-06	TRANSCRIPTIONAL REGULATOR FAMILY REGULATOR DNA-BINDING HELIX-TURN-HELIX MOTIF CRO/CI XRE PLASMID
				26 | 154	8e-15	ref|ZP_03981595.1| Cro/CI transcriptional regulator [Enterococcus faecium TX1330]
				42 | 77	1e-15	ref|ZP_05631982.1| filamentation induced by cAMP protein Fic [Fusobacterium ulcerans ATCC 49185]
	17151	hypothetical protein		6 | 7	1e-60	ref|YP_001086892.1| putative single-strand binding protein [Clostridium difficile 630]									bacterial cytoplasm = 0.180(Affirmative) < succ>	coiled coil	166	204	-	2e-05	SAG1281 GBS1354
				48 | 116	4e-08	ref|ZP_03916834.1| conjugal transfer protein (possible single-stranded DNA binding protein) [Anaerococcus lactolyticus ATCC 51172]
	17261	hypothetical protein		13 | 26	0.019	ref|XP_754663.1| DNA polymerase epsilon, catalytic subunit A/POL2 [Aspergillus fumigatus Af293]									bacterial cytoplasm= 0.335(Affirmative) < succ>	coiled coil	65	92	-
	17266	hypothetical protein													bacterial membrane= 0.164(Affirmative) < succ>	transmembrane	7	29	-
																transmembrane	33	50	-
																transmembrane	62	84	-

## Sheet: 630 CTns
Element	ORF	Annotated funtion		E-value	BYPASS results									PSORT	SMART				INTERPRO
CTn1	CD356a	hypothetical protein
	CD358	conjugative transposon conserved hypothetical		2e-21	ref|NP_721424.1| putative polyribonucleotide nucleotidyltransferase; Tn916 ORF8-like [Streptococcus mutans UA159
				1e-25	ref|ZP_05922520.1| conjugative transposon protein [Enterococcus faecium TC 6]
	CD359	conjugative transposon conserved hypothetical		2e-31	ref|ZP_04743715.2| sigma-70, region 4 superfamily [Roseburia intestinalis L1-82]
				6e-34	ref|YP_288609.1| RNA polymerase sigma factor RpoE [Thermobifida fusca YX]
				2e-31	ref|YP_002834224.1| ECF-family sigma factor H [Corynebacterium aurimucosum ATCC 700975]
	CD360	putative transcriptional regulator		1e-32	ref|ZP_04288404.1| Transcriptional regulator, GntR [Bacillus cereus R309803]
				1e-37	ref|ZP_00742279.1| Acetoin transport repressor [Bacillus thuringiensis serovar israelensis ATCC 35646]
	CD361	two-component system		6e-81	ref|ZP_03107959.1| sensor histidine kinase [Bacillus cereus NVH0597-99]
				4e-80	ref|ZP_02634826.1| two-component sensor histidine kinase [Clostridium perfringens B str. ATCC 3626]
				2e-75	ref|YP_001311234.1| integral membrane sensor signal transduction histidine kinase [Clostridium beijerinckii NCIMB 8052]
	CD362	two-component system		1e-98	ref|YP_002506220.1| two component transcriptional regulator, winged helix family [Clostridium cellulolyticum H10]
				8e-96	ref|ZP_02617269.1| putative phosphate regulon DNA-binding response regulator [Clostridium botulinum Bf]
				1e-95	ref|YP_001393566.1| sensory transduction protein [Clostridium kluyveri DSM 555
				3e-97	ref|YP_002931290.1| two-component system, OmpR family, response regulator ResD [Eubacterium eligens ATCC 27750]
	CD363	lantibiotic ABC transporter		1e-144	ref|ZP_04325676.1| Efflux ABC transporter, permease protein [Bacillus cereus m1293]
				1e-142	ref|ZP_00395154.1| COG0577: ABC-type antimicrobial peptide transport system, permease component [Bacillus anthracis str. A2012]
	CD364	lantibiotic ABC transporter		1e-117	ref|YP_695292.1| ABC transporter, ATP-binding protein [Clostridium perfringens ATCC 13124]
				1e-115	ref|ZP_02620852.1| bacitracin export ATP-binding protein BceA [Clostridium botulinum C str. Eklund]
	CD365	lantibiotic ABC transporter		2e-16	ref|NP_782389.1| membrane spanning protein [Clostridium tetani E88]
				8e-13	ref|ZP_04393987.1| lantibiotic ABC transporter (permease) [Geobacillus sp. Y412MC52]
				1e-16	ref|YP_001423228.1| MrsE [Bacillus amyloliquefaciens FZB42]						mersacidin resistance
				8e-14	emb|CAC60275.1| RumG protein [Ruminococcus gnavus]						ruminicoccin A resistance
				2e-16	ref|ZP_03114938.1| putative bacitracin ABC transporter, permease protein [Bacillus cereus 03BB108]
	CD366	lantibiotic ABC transporter		1e-113	ref|ZP_05472133.1| bacitracin transport ATP-binding protein BcrA [Anaerococcus vaginalis ATCC 51170]
				1e-110	ref|YP_077537.1| ABC transporter YcbN [Bacillus licheniformis ATCC 14580]
				1e-109	gb|AAS78451.1| BcrA [Enterococcus faecalis]
	CD367	two-component system		6e-95	ref|NP_847291.1| sensor histidine kinase [Bacillus anthracis str. Ames]
	CD368	two-component system		7e-97	gb|ABB80126.1| SubR [Bacillus subtilis]
				4e-98	ref|YP_002770874.1| two-component response regulator [Brevibacillus brevis NBRC 100599]
	CD369	hypothetical protein		1e-14	ref|ZP_05348848.3| ABC transporter ATP-binding protein [Bryantella formatexigens DSM 14469]									bacterial cytoplasm= 0.305(Affirmative) < succ>	low complexity	17	26	-
	CD386	surface protein		1e-141	ref|ZP_04743738.1| putative LPXTG-motif protein cell wall anchor domain protein [Roseburia intestinalis L1-82]
				1e-62	ref|ZP_05348155.1| Cna protein B-type domain protein [Bryantella formatexigens DSM 14469]
				6e-26	sp|Q53654|CNA_STAAU RecName: Full=Collagen adhesin; Flags: Precursor gb|AAA20874.1| collagen adhesin [Staphylococcus aureus]
CTn2	CD427	DNA binding protein		1e-19	ref|ZP_01169079.1| DNA-binding protein [Bacillus sp. NRRL B-14911]
				1e-20	ref|YP_001125688.1| PbsX family transcriptional regulator [Geobacillus thermodenitrificans NG80-2]
				1e-20	ref|YP_003128438.1| transcriptional regulator, XRE family [Methanocaldococcus fervens AG86]
				4e-19	ref|ZP_00237789.1| transcriptional regulator, Cro/CI family [Bacillus cereus G9241]
	CD428	AraC transcriptional regulator		4e-51	ref|YP_001787665.1| AraC family transcriptional regulator [Clostridium botulinum A3 str. Loch Maree]
				9e-52	ref|ZP_05634078.1| transcriptional regulator [Fusobacterium ulcerans ATCC 49185]
				2e-47	ref|ZP_01108172.1| activator protein MtlR [Flavobacteriales bacterium HTCC2170]
	CD429	putative membrane protein		2e-32	ref|ZP_04835370.1| putative permease [Corynebacterium matruchotii ATCC 14266]									bacterial membrane= 0.522(Affirmative) < succ>	Pfam:Trep_Strep	7	195	1.2e-69	2.9e-19	Trep_Strep
				9e-33	ref|ZP_03916378.1| major facilitator superfamily permease [Anaerococcus lactolyticus ATCC 51172]
				2e-32	ref|YP_002746530.1| ABC transporter permease protein [Streptococcus equi subsp. equi 4047]
	CD430	putative membrane protein		2e-37	ref|YP_002938861.1| cobalt transport protein [Eubacterium rectale ATCC 33656]
				3e-41	ref|ZP_03980799.1| ABC superfamily ATP binding cassette transporter, membrane protein [Enterococcus faecium TX1330]
	CD431	ABC transporter		0	ref|ZP_01722151.1| putative peptide transport system atp-binding abc transporter protein [Bacillus sp. B14905]
	CD432	ABC transporter		0	ref|ZP_05390878.1| ABC transporter [Clostridium carboxidivorans P7]
				0	ref|ZP_02948268.1| ABC-type multidrug/protein/lipid transport system, ATPase component [Clostridium butyricum 5521]
	CD433	ABC transporter		0	ref|YP_001254433.1| ABC transporter, ATP-binding/permease protein [Clostridium botulinum A str. ATCC 3502]
				0	ref|YP_001887138.1| lipid A export ATP-binding/permease protein MsbA [Clostridium botulinum B str. Eklund 17B]
	CD434	putative drug /sodium antiporter		1e-129	ref|ZP_04804788.1| MATE efflux family protein [Clostridium cellulovorans 743B]
				1e-124	ref|ZP_05760534.1| putative Na+-driven multidrug efflux pump [Bacteroides sp. D2]
				1e-120	ref|ZP_02171521.1| acriflavin resistance protein [Bacillus selenitireducens MLS10]
				1e-124	ref|NP_635218.1| DinF protein [Methanosarcina mazei Go1]
				1e-123	ref|NP_616972.1| DNA damage-inducible protein [Methanosarcina acetivorans C2A]
CTn4	CD1095	lantibiotic ABC transporter		7e-14	ref|ZP_05336622.1| putative lantibiotic ABC transporter, permease protein [Thermoanaerobacterium thermosaccharolyticum DSM 571]
				2e-16	ref|YP_035266.1| permease; MrsE protein [Bacillus thuringiensis serovar konkukian str. 97-27]
				2e-15	ref|ZP_03109610.1| putative bacitracin ABC transporter, permease protein [Bacillus cereus NVH0597-99]
				6e-15	emb|CAA63567.1| cdd2 [Clostridium difficile]
				7e-19	emb|CAB60257.1| MrsE protein [Bacillus sp. HIL-Y85/54728]
				3e-16	ref|YP_034604.1| bacitracin ABC transporter, permease [Bacillus thuringiensis serovar konkukian str. 97-27
	CD1096	lantibiotic ABC transporter		2e-34	ref|YP_003107278.1| ABC transporter, ATP binding/permease protein [Brucella microti CCM 4915]
				5e-28	ref|ZP_05619428.1| CcmA protein [Enhydrobacter aerosaccus SK60]
				3e-38	ref|YP_002384558.1| fused ribosome-associated ATPase: ATP-binding protein ; ATP-binding protein ; putative membrane protein [Escherichia fergusonii ATCC 35469
	CD1097	lantibiotic ABC transporter		1e-111	ref|ZP_05854214.1| bacitracin transport ATP-binding protein BcrA [Blautia hansenii DSM 20583]
				1e-108	ref|ZP_05798037.1| putative lantibiotic ABC transporter,ATP-binding protein [Oribacterium sp. oral taxon 078 str. F0262]
				1e-118	sp|P42332|BCRA_BACLI RecName: Full=Bacitracin transport ATP-binding protein bcrA gb|AAA99504.1| TTG start codon [Bacillus licheniformis]
	CD1098	two-component system		5e-92	ref|YP_077697.1| histidine kinase, homodimeric YclK [Bacillus licheniformis ATCC 14580]
				4e-94	ref|YP_002770292.1| two-component sensor histidine kinase [Brevibacillus brevis NBRC 100599]
	CD1099	two-component system		1e-102	ref|ZP_05393916.1| two component transcriptional regulator, winged helix family [Clostridium carboxidivorans P7]
				1e-102	ref|NP_976622.1| DNA-binding response regulator [Bacillus cereus ATCC 10987
				3e-97	ref|ZP_04822208.1| regulatory protein VanR [Clostridium botulinum E1 str. 'BoNT E Beluga']
	CD1099a	hypothetical protein		3e-25	ref|YP_001786056.1| transposase and inactivated derivatives [Clostridium botulinum A3 str. Loch Maree]									bacterial cytoplasm= 0.214(Affirmative) < succ>
				7e-18	ref|NP_782496.1| putative transposase [Clostridium tetani E88
				4e-20	ref|ZP_05427293.1| filamentation induced by cAMP protein Fic [Eubacterium saphenum ATCC 49989]
				3e-18	ref|YP_003189983.1| transcriptional regulator, AraC family [Desulfotomaculum acetoxidans DSM 771]
				3e-17	ref|YP_001620434.1| Fic-domain-containing protein [Acholeplasma laidlawii PG-8A]
				0.0008	ref|YP_001959483.1| DNA binding domain protein, excisionase family [Chlorobium phaeobacteroides BS1]
CTn5	CD1871	hypothetical protein		1e-62	ref|ZP_01883318.1| thioredoxin family protein [Pedobacter sp. BAL39]									bacterial outside= 0.300(Affirmative) < succ>	low complexity	9	19	-	0	THIOREDOXIN
				2e-56	ref|YP_862084.1| AhpC/TSA family protein [Gramella forsetii KT0803]										Pfam:Redoxin	228	379	4.4e-10	5.6e-21	Thioredoxin_fold
															Pfam:AhpC-TSA	233	360	4e-08	1.3e-24	Thiordxn-like_fd
															antioxidant activity				3.6e-08	Redoxin
	CD1871a	hypothetical protein		3e-06	ref|NP_815555.1| thioredoxin family protein [Enterococcus faecalis V583									bacterial outside= 0.300(Affirmative) < succ>	transmembrane	5	27	-		signal-peptide
																				transmembrane_regions
	CD1872	iron-sulfur binding membrane protein		2e-76	ref|ZP_01305644.1| Polyferredoxin [Oceanobacter sp. RED65]									bacterial membrane= 0.688(Affirmative) < succ>	transmembrane	97	119	-	NA	4Fe-4S ferredoxin, iron-sulphur binding
				2e-77	ref|YP_002157335.1| cytochrome c oxidase accessory protein CcoG [Vibrio fischeri MJ11]										transmembrane	146	165	-		transmembrane_regions
				6e-77	ref|ZP_01814813.1| FixG-related protein [Vibrionales bacterium SWAT-3]										transmembrane	198	220	-
				1e-77	ref|ZP_02197204.1| potassium transporter peripheral membrane component [Vibrio sp. AND4]										Pfam:Fer4	245	268	0.00046
															Pfam:Fer4	270	293	4.4e-05
	CD1873	ABC transporter vexP1		1e-112	ref|YP_001466845.1| macrolide export ATP-binding/permease protein MacB [Campylobacter concisus 13826]
				1e-117	ref|YP_099152.1| ABC transporter permease protein [Bacteroides fragilis YCH46]
	CD1874	ABC transporter vexP2		2e-91	ref|NP_632974.1| ABC transporter, ATP-binding protein [Methanosarcina mazei Go1
				9e-92	ref|ZP_02620378.1| lipoprotein-releasing system ATP-binding protein LolD [Clostridium botulinum C str. Eklund]
	CD1875	ABC transporter vexP3		1e-110	ref|YP_003007224.1| macrolide export ATP-binding/permease protein MacB [Aggregatibacter aphrophilus NJ8700
				1e-119	ref|ZP_05987141.1| putative ABC transporter, ATP-binding protein [Neisseria lactamica ATCC 23970]
				1e-117	ref|YP_001598646.1| macrolide transport system ATP-binding protein [Neisseria meningitidis 053442]
	CD1876	two-component system		2e-93	ref|ZP_02639037.1| DNA-binding response regulator [Clostridium perfringens CPE str. F4969]
				3e-91	ref|ZP_04202243.1| Two-component response regulator [Bacillus cereus F65185]
				4e-92	ref|ZP_04862121.1| transcriptional regulatory protein ResD [Clostridium botulinum D str. 1873]
	CD1877	two-component system		1e-104	ref|ZP_03239250.1| sensor histidine kinase [Bacillus cereus H3081.97]
				1e-102	ref|NP_830465.1| two component system histidine kinase [Bacillus cereus ATCC 14579]
				1e-104	ref|ZP_00238807.1| sensory box histidine kinase PhoR, putative [Bacillus cereus G9241]
	CD1878	hypothetical protein		3e-32	ref|YP_002930773.1| RNA polymerase sporulation-specific sigma factor [Eubacterium eligens ATCC 27750]									bacterial cytoplasm= 0.244(Affirmative) < succ>	low complexity	124	136	-	3.3e-10	RNA polymerase sigma factor, regions 3 and 4
				2e-35	ref|ZP_05332527.1| RNA polymerase, sigma 28 subunit, SigG [Thermoanaerobacter italicus Ab9]
	CD1878b	hypothetical protein												bacterial cytoplasm= 0.240(Affirmative) < succ>
	CD1878a	serine recombinase pseusogene		1e-137	ref|YP_002744787.1| site-specific recombinase [Streptococcus equi subsp. zooepidemicus]
CTn6	CD3331	hypothetical protein		8e-49	ref|ZP_05274766.1| conjugated bile acid hydrolase [Listeria monocytogenes FSL J2-064]									bacterial cytoplasm= 0.209(Affirmative) < succ>					5.9e-06	Ntn hydrolases) superfamily
				2e-47	ref|ZP_02636780.1| choloylglycine hydrolase [Clostridium perfringens B str. ATCC 3626
	CD3332	TetR transcriptional regulator		6e-32	ref|ZP_04564054.1| tetR-family transcriptional regulator [Mollicutes bacterium D7
	CD3333	hypothetical protein		6e-27	ref|ZP_05852930.1| TfoX domain protein [Blautia hansenii DSM 20583]									bacterial cytoplasm= 0.281(Affirmative) < succ>					1.8e-09	TfoX	expression of late competence-specific genes
	CD3333a	hypothetical protein												bacterial cytoplasm= 0.256(Affirmative) < succ>
	CD3334	hypothetical protein		2e-32	ref|YP_001697460.1| AraC/XylS family transcriptional regulator [Lysinibacillus sphaericus C3-41]									bacterial cytoplasm= 0.033(Affirmative) < succ>	AraC_E_bind	2	155	1.44e-20	1.9e-13	AraC_E_bind
				3e-37	ref|ZP_04325688.1| Transcriptional regulator, AraC [Bacillus cereus m1293]														2.1e-16	Regulatory factor, effector, bacterial
																			1.3e-05	Multidrug-efflux Transporter 1 Regulator Bmrr
	CD3335	conjugative transposon protein		1e-90	ref|YP_001694720.1| conjugative transposon protein [Streptococcus pneumoniae Hungary19A-6]									bacterial membrane= 0.486(Affirmative) < succ>	low complexity	6	24	-		signal-peptide
				4e-92	ref|NP_687939.1| Tn916 hypothetical protein [Streptococcus agalactiae 2603V/R]										transmembrane	30	52	-		transmembrane_regions
	CD3336	cell wall hydrolase		1e-108	ref|ZP_03079517.1| NLP/P60 family protein [Ureaplasma urealyticum serovar 9 str. ATCC 33175]									bacterial membrane= 0.626(Affirmative) < succ>	transmembrane	7	29	-	5.7e-45	NLPC_P60
				6e-94	ref|ZP_05646879.1| lipoprotein [Enterococcus casseliflavus EC30]										Pfam:NLPC_P60	225	331	7e-47
				1e-97	ref|ZP_00785340.1| TN916 ORF14-like protein lmo1104 [Streptococcus agalactiae COH1]										tail component of prophage, invasin, invasion associatedendopeptidase
				5e-80	ref|NP_388378.1| putative cell wall hydrolase; mobile element region [Bacillus subtilis subsp. subtilis str. 168]										protein, putative lipoprotein, cell wall hydrolase, or putative endopeptidase
CTn7	CD3372	hypothetical protein												bacterial membrane= 0.232(Affirmative) < succ>					NA	TONB_DEPENDENT_REC_1			tonB protein interacts with outer membrane receptor proteins
	CD3373	magnesium transporting ATPase		0	ref|YP_001557669.1| magnesium-translocating P-type ATPase [Clostridium phytofermentans ISDg]									bacterial membrane= 0.429(Affirmative) < succ>	Cation_ATPase_N	29	102	6.98e-10	8.4e-16	HATPASE
				0	ref|YP_001032532.1| cation-transporting P-ATPase [Lactococcus lactis subsp. cremoris MG1363]										Pfam:E1-E2_ATPase	124	357	1.5e-69	1.8e-29	ATPase, P-type, K/Mg/Cd/Cu/Zn/Na/Ca/Na/H-transporter
				0	ref|NP_606863.1| putative calcium-transporting ATPase [Streptococcus pyogenes MGAS8232]										Pfam:Hydrolase	361	661	1.6e-17
															Pfam:Cation_ATPase_C	721	912	0.005
	CD3374	putative membrane protein												bacterial membrane= 0.336(Affirmative) < succ>	transmembrane	5	22	-		signal-peptide
															transmembrane	72	94	-		transmembrane_regions
	CD3374a	putative membrane protein												bacterial membrane= 0.637(Affirmative) < succ>	transmembrane	13	32	-		signal-peptide
															transmembrane	42	64	-		transmembrane_regions
	CD3375	Magnesium transporting ATPase		6e-43	ref|ZP_04324981.1| Mg(2+) transport ATPase protein C [Bacillus cereus m1293]									bacterial membrane= 0.312(Affirmative) < succ>	Pfam:MgtC	13	141	3.3e-34	7e-32	MgtC
				5e-43	ref|ZP_05414567.2| MgtC family protein [Bacteroides finegoldii DSM 17565]										MgtC may act as an accessory protein for MgtB, thus
				5e-44	ref|ZP_03265293.1| MgtC/SapB transporter [Burkholderia sp. H160]										mediating magnesium influx into the cytosol
	CD3376	putative transciptional regulator		2e-67	ref|ZP_04172051.1| Two-component response regulator [Bacillus mycoides DSM 2048]									bacterial cytoplasm= 0.124(Affirmative) < succ>	Trans_reg_C	88	164	6.11e-24	0	Trans_reg_C
				2e-66	ref|YP_003190037.1| two component transcriptional regulator, winged helix family [Desulfotomaculum acetoxidans DSM 771]														1.4e-27	Wing_hlx_DNA_bd
				3e-66	ref|ZP_02951068.1| regulatory protein VanR [Clostridium butyricum 5521]
				4e-68	ref|YP_002930659.1| two-component system, OmpR family, phosphate regulon response regulator OmpR [Eubacterium eligens ATCC 27750]
				8e-68	ref|ZP_05856033.1| DNA-binding response regulator VicR [Blautia hansenii DSM 20583]
				2e-67	ref|ZP_01722978.1| sensor histidine kinase [Bacillus sp. B14905
	CD3377	Magnesium transporting ATPase		0	ref|YP_097494.1| Mg2+ transport ATPase protein B [Bacteroides fragilis YCH46]									bacterial membrane= 0.529(Affirmative) < succ>	Cation_ATPase_N	13	86	2.58	1e-191	CATION-TRANSPORTING ATPASE
				0	ref|YP_001032532.1| cation-transporting P-ATPase [Lactococcus lactis subsp. cremoris MG1363]										Pfam:E1-E2_ATPase	101	333	7.8e-52	5.8e-26	ATPase_P-type: ATPase, P-type (transporting
															Pfam:Hydrolase	337	635	2.9e-09	1.1e-13	Hydrolase
															transmembrane	671	693	-	1e-191	MG(2+)-TRANSPORTING ATPASE BACTERIA
															Pfam:Cation_ATPase_C	695	878	5.8e-05
	CD3378	Hypothetical protein		6e-10	ref|ZP_05626852.1| flavodoxin [Fusobacterium sp. D12]									bacterial cytoplasm = 0.294(Affirmative) < succ>	low complexity	2	11	-

## Sheet: Put Mobilisable elements
strain	ORF	Annotated funtion				PSORT	SMART domain	AA start	AA end	E-value	PRODOM
63Q42	7732	ABC-type antimicrobial peptide transport				bacterial membrane --- Certainty= 0.582	transmembrane	29	51	-
							low complexity	55	64	-
							Pfam:FtsX	273	400	1.1e-20
							transmembrane	440	462	-
							low complexity	654	668	-
							Pfam:FtsX	745	868	6.8e-11
	7737	ABC-type antimicrobial peptide transport				bacterial cytoplasm --- Certainty= 0.284	AAA	32	218	1.06e-15	ATP-BINDING MEMBRANE NUCLEOTIDE-BINDING ABC TRANSPORTER
	7742	Histidine Kinase				bacterial outside --- Certainty= 0.300(Affirmative)	signal peptide	1	56	-	KINASE HISTIDINE ATP-BINDING DOMAINS HISKA
							HisKA	123	189	2.96e-07
							HATPase_c	234	343	8.95e-25
	7747	Response regegulator CheY-like				bacterial cytoplasm --- Certainty= 0.142(Affirmative)	REC	1	112	1.45e-34	TRANSCRIPTION REGULATOR RESPONSE TWO-COMPONENT REGULATORY DNA-BINDING SENSORY TRANSDUCTION PHOSPHORYLATION REGULATION
							Trans_reg_C	146	221	2.64e-19
	7752	Hypothetical				bacterial cytoplasm --- Certainty= 0.138(Affirmative) < succ>
	7757	Hypothetical				bacterial cytoplasm --- Certainty= 0.050(Affirmative)					DNA-BINDING DNA EXCISIONASE/XIS PROTEIN BINDING PROPHAGE FAMILY EXCISIONASE LAMBDABA04 DOMAIN
	7762	Hypothetical				bacterial cytoplasm --- Certainty= 0.377(Affirmative) < succ>	coiled coil	1	38	-	PLASMID ORF00003-LIKE ORF40 ORF00003
	7767	Hypothetical				bacterial cytoplasm --- Certainty= 0.349(Affirmative) < succ>	Pfam:MobA_MobL	1	193	7.8e-54	PLASMID MOBA/MOBL MOBILIZATION TRANSFER TRAA CONJUGAL CONJUGATION PROBABLE NICKING ENZYME
							coiled coil	278	325	-
	7772	Hypothetical				bacterial cytoplasm --- Certainty= 0.314(Affirmative)
	7777	P-loop ATPase				bacterial cytoplasm --- Certainty= 0.081(Affirmative	Pfam:VirE	1	151	2.2e-28	VIRULENCE-ASSOCIATED E HELICASE PHAGE SIMILAR DOMAIN PROPHAGE LP3 8 P-LOOP
	7782	Hypothetical				bacterial cytoplasm --- Certainty= 0.231
	7787	Recombinase				bacterial cytoplasm --- Certainty= 0.228	Resolvase	12	161	6.42e-41	RECOMBINASE SITE-SPECIFIC N-TERMINAL
							Pfam:Recombinase	184	311	4.6e-30
							low complexity	410	427	-
							coiled coil	445	486	-
43255	10527					bacterial outside --- Certainty= 0.300(Affirmative)	signal peptide	1	29	-
